# Supplementary material for: Gene Expression in Fixed Tissues and Outcome in Hepatocellular Carcinoma
Source: Atypon-hosted journal article supplement (doi:10.1056/nejmoa0804525), 2008-10-16

## Supplementary Appendix

This appendix has been provided by the authors to give readers additional information about their work.

Supplement to: Hoshida Y, Villanueva A, Kobayashi M, et al. Gene expression in fixed tissues and outcome in hepatocellular carcinoma. *N Engl J Med* 2008;359:1995-2004.

## **RNA extraction**

Tumor and adjacent liver tissues were macro-dissected from 10 micron formalin-fixed, paraffin-embedded (FFPE) tissue sections. Absence of microvascular tumor invasion in the adjacent liver tissue was confirmed using H & E staining of consecutive sections. Using 3-4 sections for each sample, total RNA was extracted using the High Pure RNA Paraffin kit (Roche) as directed by the manufacturer (training set) or TRIzol LS reagent (Invitrogen) in a semi-automated 96-well plate format based on the manufacturer's instructions (validation set).

## **Gene expression arrays for FFPE tissues**

### *DASL assay*

To profile randomly fragmented mRNA extracted from FFPE tissue (FFPE-RNA), we employed the cDNA-mediated Annealing, Selection, extension and Ligation (DASL) assay (Illumina)<sup>1, 2</sup>. Briefly, fragmented FFPE-RNA is converted into cDNA using random primers. For each target site on the cDNA, a pair of query oligos separated by a single nucleotide is annealed to the cDNA, and the gap between the query oligos is extended and ligated to generate a PCR template. A pair of universal PCR primers is then used for amplification, and linearly amplified PCR products are hybridized to a bead microarray. The array was then scanned by a BeadArray Reader (Illumina).

### *Number of microarray probes assigned to each gene*

Missing signals due to RNA degradation is one of the major concerns in profiling FFPE tissues. For this reason, a commercially available panel of 502 cancer-related genes for DASL assay (Cancer Panel, Illumina) assigns 3 independent probes to each gene, with the expectation that this would maximize data quality. However, the use of multiple probes per gene diminishes the number of transcripts that can be assayed per array (given a fixed number of probes per array). We therefore sought to experimentally determine the effect of reducing the number of probes per gene, so as to facilitate covering a larger number of genes with the same total number of probes. We randomly picked a single probe from among the 3 probes assigned to each gene, and evaluated how the single probe dataset performed in sample clustering and marker gene selection analyses.

First, by picking a single probe for each gene, 5~7% of measurements fell below the

level of negative control probes, suggesting either missing signals due to RNA degradation or suboptimal probe sequence (**Supplementary Figure 1A**). However, we found that such probe drop-out had little effect on overall performance of the arrays. For example, a prostate cancer vs. normal distinction was not affected by the single probe picking (**Supplementary Figure 1B**). This suggests that profiling 100s~1000s genes can compensate for the slight increase in noise caused by RNA degradation. In marker gene analysis, only a small number of genes were dropped from the top marker gene list (indicating a small number of false negatives), and no genes came to the top of the marker list in the single probe data but were absent in the dataset using 3 probes per gene (indicating no false positives) (**Supplementary Figure 1C**).

#### *Designing a 6,000-gene DASL assay*

We sought to identify ~ 6,000 maximally informative transcripts that could be used for genome-wide discovery on the DASL platform (configured as 4 x 1536 assays utilizing one probe per gene). To address this, we analyzed a large collection of Affymetrix transcriptome datasets profiling cancer and normal tissues.<sup>3, 4</sup> This analysis revealed that the expression signals from ~ one third of the genes on most genome-wide arrays were “absent” (**Supplementary Figure 8**). This suggests that a substantial proportion of the genome is infrequently expressed, and therefore might be omitted without great consequence. By excluding such genes, we aimed to define a generic minimum subset of genome representing the global structure of the entire transcriptome.

We designed a set of query oligos (i.e., probes) to profile transcriptionally informative genes that might be useful for signature discovery and validation. To this end, we selected genes with the largest variation across samples in a large collection of previously generated Affymetrix microarray datasets spanning 24 studies, 2,149 samples, and 15 tissue types (**Supplementary Table 8**). After filtering out genes with less than a 3-fold difference and less than 100 units between the maximum and minimum signals across the dataset, the coefficient of variation (CV) was calculated and summarized onto the NCBI’s RefSeq gene IDs to compute a priority score for each gene, and genes were rank-ordered according to this score (**Supplementary Figure 9A**). An examination of published marker genes from recent studies indicated

that our list of 6,000 genes represented 70-90% of these genes, indicating that the 6,000 gene array was more informative than a random collection of 6,000 genes (which might be expected to capture only ~ 25% of reported markers) (**Supplementary Figure 9B**). We then designed query oligos for the top informative 6,100 genes (NCBI's Gene Expression Omnibus, <http://www.ncbi.nlm.nih.gov/geo/>, platform ID GPL5474).

#### *Quality assessment of DASL profile*

As a quality measure of the DASL gene expression profile, we calculated the proportion of gene probes with a “present” signal (%P-call), which is expected to be similar across samples of a given tissue type (e.g. HCC). (Of note, the “present” call rate drops precipitously when degraded RNA typical of FFPE tissues is analyzed on conventional microarrays such as Affymetrix arrays). The “present” call was computed based on built-in negative control probes (GenePattern, IlluminaDASL pipeline). In a pilot experiment performed on 10 prostate cancer tissues, we observed %P-call of ~ 75% in 2 samples fixed 24 years before RNA extraction, which was comparable to a sample fixed 7 years ago (**Supplementary Figure 9C**), indicating that data quality is not directly correlated with age of the sample.

Poor quality profiles were detected and removed as follows. We set a “median” array as a representative sample in a dataset by calculating the median for each gene. The poor quality, outlier profiles were defined based on dissimilarity to the “median” array measured by Pearson correlation coefficient. In the plot of the correlation to %P-call, we observed that the correlation sharply started to drop as %P-call became smaller than a certain value. This likely indicates that the samples with %P-call smaller than this value have severe RNA degradation affecting sensitivity of gene expression signal detection. Based on this plot, we set a quality threshold of %P-call for each tissue type to assure a minimum correlation coefficient of 0.7 for the majority of the samples (we set the %P-call quality thresholds of 65% and 70% for tumor and adjacent liver tissues, respectively, **Supplementary Figure 10**). Failure of the profiling, i.e., %P-call less than 70% in adjacent liver set, was not associated with clinical variables including age ( $p=0.49$ ), sex ( $p=0.78$ ), existence of cirrhosis ( $p=1.00$ ), Child-Pugh stage ( $p=0.11$ ), HCC etiology ( $p>0.70$ ), or age of the FFPE block ( $>10$  years,  $p=0.30$ ).

The same %P-call threshold was applied for the validation set. After eliminating samples with poor quality data, the raw data were normalized using the cubic spline algorithm<sup>5</sup> using the IlluminaDASL pipeline within GenePattern. Only gene probes with a minimal 3-fold differential expression and absolute difference >500 units across the samples were included after applying floor and ceiling values of 200 and 80,000 units, respectively.

#### *Comparison of gene expression profiles between intact and FFPE-RNA*

First, we evaluated the extent of correlation of gene expression profile of FFPE tissue with that of fresh tissue at the level of individual genes. To ensure a uniform population of cells being subjected to the fresh and fixed analysis, we used cell lines (as opposed to tissues, which have greater intra-tissue variability which would become a confounding factor in these analyses). DHL4 and HeLa cell lines were cultured, harvested, and split into two halves. Total RNA was immediately extracted from one half, and the other half was fixed with formalin and embedded in a paraffin block. Total RNA was also extracted from the FFPE block using the protocol described in the **Methods** section. All RNA samples were profiled using the DASL assay, and fold changes were calculated for each gene in a comparison between DHL4 and HeLa cell lines. The plot of the fold changes for the intact and FFPE cell lines showed moderate correlation (Pearson correlation coefficient 0.61,  $p < 0.001$ , **Supplementary Figure 11**). At the higher fold changes in the fresh RNA profiles, the vast majority of the genes showed concordant gene expression changes in the FFPE profiles (**Supplementary Table 9**).

Next, we determined whether the DASL profile of FFPE tissue recapitulates the biologically relevant information observed in the profile of fresh frozen tissue. For this analysis, we turned to prostate cancer, for which there exists an abundance of published microarray data derived from frozen tumor and normal tissues. We identified 200 marker genes that reflect the tumor vs. normal prostate distinction based on a meta-analysis of 7 published frozen sample-based microarray datasets collected in a cancer transcriptome database (Oncomine, <http://www.oncomine.org>). Among those genes, 180 genes (90%) are included in our 6,100 informative gene panel. Based on the expression pattern of those marker genes, we classified a

collection of FFPE tumor and normal prostate samples using a nearest template prediction method (see Data analysis section). We observed 100% accurate prediction with statistical significance (false discovery rate  $<0.05$ , **Supplementary Figure 12**), indicating that the 6,000-gene DASL assay robustly identifies biologically meaningful patterns in FFPE tissues. We also performed a meta-analysis of 3 independent frozen sample-based HCC datasets including 232 samples to define common subclasses of HCC, and found that the molecular subclasses identified in the frozen tissues were also seen in the profiles of 118 FFPE HCC tissues profiled by DASL (manuscript in preparation). We therefore conclude that our 6,000-gene DASL assay accurately recapitulates the gene expression profile of fresh frozen tissues in archived, FFPE material.

### **Data availability**

Microarray datasets are available through Gene Expression Omnibus (GSE10143) or our web site at <http://www.broad.mit.edu/cancer/pub/HCC>.

### **Data analysis**

#### *Definition of clinical outcome*

While HCC is the cause of death in most patients with the disease, some patients die of liver failure or other causes attributable to cirrhosis in the absence of progressive HCC (7 of the 39 deaths in our study died of non-HCC causes). Accordingly, we chose HCC-related mortality (disease-specific death) as the principal clinical endpoint for the survival-predictive signature discovery, defined as follows: (1) tumor occupying more than 80% of the liver, (2) portal venous tumor thrombus (PVTT) proximal to the second bifurcation, (3) obstructive jaundice due to tumor, (4) distant metastasis, or (5) variceal hemorrhage with PVTT proximal to the first bifurcation. The commonly used definition of “late recurrence” was tumor recurrence appearing more than 2 years after surgery<sup>6, 7</sup>. For late recurrence prediction, early recurrences were treated as censored observations.

#### *Prognostic prediction*

Most outcome prediction studies discretize outcome in a binary fashion, creating two classes of patients: those with good outcome, and those with bad outcome. Unfortunately, this approach requires creating a boundary between the two groups that

is often not obvious, and the approach works poorly with patients of intermediate outcome. In this study, we used non-discretized, censored survival time to select signature genes in order to not sacrifice sample size and to avoid the problem of setting an arbitrary cut-off of survival time. In addition, we sought to determine whether the expression of poor- and good-prognosis signature genes were coordinately regulated in a given sample. That is, it was expected that the poor signature genes would be ON (or up) and the good signature genes would be OFF (or down) in a “poor” survival sample. To evaluate this, we designed a simple nearest neighbor-based method assessing a sample’s proximity to a hypothetical representative sample (template) of poor or good survival. This approach allowed us to perform single sample-based outcome prediction. The details of the method are described below.

Genes positively or negatively correlated with HCC-related survival or time-to-recurrence were selected using the Cox score<sup>8,9</sup> using the following formula.

$$d = \left[ \sum_{k=1}^K (x_k^* - d_k \bar{x}_k) \right] / \left[ \sum_{k=1}^K (d_k / m_k) \sum_{i \in R_k} (x_i - \bar{x}_k)^2 \right]^{1/2}$$

where  $i$  is indices of samples,  $x_i$  is gene expression level for sample  $i$ ,  $t_i$  is time for sample  $i$ ,  $k \in 1, \dots, K$  is indices of unique death times  $z_1, z_2, \dots, z_K$ ,  $d_k$  is number of deaths at time  $z_k$ ,  $m_k$  is number of samples in  $R_k = \{i : t_i \geq z_k\}$ ,  $x_k^* = \sum_{i \in R_k} x_i$ , and  $\bar{x}_k = \sum_{i \in R_k} x_i / m_k$ . Prediction analysis was performed by evaluating the expression status of the signature using the nearest template prediction (NTP) method as implemented in the NearestTemplatePrediction module of the GenePattern analysis toolkit. Briefly, a hypothetical sample serving as the template of “poor” outcome was defined as a vector having the same length as the predictive signature. In this template, a value of 1 was assigned to “poor” outcome-correlated genes and a value of -1 was assigned to “good” outcome-correlated genes, and then each gene was weighted by the absolute value of the corresponding Cox score. The template of “good” outcome was similarly defined. For each sample, a prediction was made based on the proximity measured by the cosine distance to either of the two templates. Significance for the proximity was estimated by comparison to a null distribution generated by randomly picking (1,000 times) the same number of marker genes from

the microarray data for each sample, and correcting for multiple hypothesis testing using the false discovery rate (FDR)<sup>10</sup>. A sample closer to the template of “poor” outcome with an FDR <0.05 was predicted as having poor outcome.

#### *Study design to define outcome-predictive signature*

Tumor and adjacent non-tumor liver tissues from the training set were profiled separately to define an outcome-predictive signature (**Figure 1**). The signature was first internally validated in the training set using a leave-one-out cross-validation prediction procedure. A single sample was left out one-by-one and an outcome-correlated signature was selected from the remaining samples (selecting marker genes based on permutation test p-value less than 0.05). A predicted label was assigned to the left-out sample based on the closest “template” using NTP algorithm. Only genes selected in each of the leave-one-out trials were included in the outcome-predictive signatures tested on the validation set.

#### *Gene Set Enrichment Analysis*

Functional annotation of the survival signature was performed by Gene Set Enrichment Analysis (GSEA)<sup>11</sup>. We evaluated two categories of annotated gene sets: target genes of experimental perturbation (473 sets) and literature-based curated pathway gene sets (150 sets) collected in our molecular signature database (MSigDB, <http://www.broad.mit.edu/gsea/msigdb/index.jsp>).

#### *Survival data analysis*

Survival difference was evaluated by the log-rank test, and survival association of clinical variables and the signatures was assessed by Cox regression analysis (Survival Analysis modules, GenePattern). First, we evaluated well-accepted clinical predictors of HCC outcome<sup>6, 12</sup>: AFP, multinodularity, and vascular invasion, by univariate analysis. Only variables with statistical significance (p<0.05) were further evaluated by multivariate analysis. The hazard rate for tumor recurrence was calculated as previously described<sup>7, 13</sup> to estimate the pattern of HCC recurrence over time after surgery. GenePattern modules and pipeline used in this study are available from <http://www.broad.mit.edu/cancer/software/genepattern/>. All other clinical data analyses were performed using the R statistical package (<http://www.r-project.org>).

### **Clonality analysis**

We profiled 5 pairs of primary and recurrent HCC tumors, 2 pairs of adjacent non-tumor liver tissues, and HeLa cells for SNPs using the LinkagePanel beadarray (Illumina) according to the manufacturer's instructions<sup>14</sup>. Genotype calls were generated using BeadStudio software (Illumina). In order to address whether primary tumors and recurrences likely derived from the same clone, we analyzed the pattern of heterozygosity in each of the samples. In particular, we counted how many loci appeared homozygous in the primary tumor, yet were called as heterozygous at recurrence. Such cases would suggest that primaries and recurrences derived from different clones, given that regions of LOH in a primary tumor (appearing homozygous on SNP arrays) would likely appear the same in recurrences if the recurrences derived from the same clone (**Supplementary Table 7A**). We similarly analyzed pairs of primary and recurrence/metastasis tumor tissues in endometrial (n=3), ovarian (n=4), lymphoma (n=6) and renal (n=3) cancers to estimate the same measure of clonality in other, non-HCC tumor types (**Supplementary Table 7B**). Strikingly, the HCC pairs showed a significantly higher proportion of loci that appeared homozygous in the primary tumor, yet appeared heterozygous at recurrence (p=0.008, Wilcoxon rank sum test). Similarly, there were more loci that were heterozygous in the HCC primary and homozygous at recurrence, compared to other tumor types (p=0.001) (**Supplementary Figure 7**).

### **Outcome prediction using HCC tissue data**

We determined whether other machine-learning classifiers based on the binary classes (i.e., "good" and "poor" prognosis) predict outcome in the profiles of HCC tissues. We tested multiple classification methods including Classification of Regression Tree (CART), k-nearest neighbor (k-NN), weighted voting (WV), and support vector machine (SVM), but as shown in **Supplementary Table 10**, these methods also failed to yield statistically significant predictions (p=0.34 for survival and p=0.92 for recurrence. Log-rank test). This result indicates that the failed HCC tissue-based outcome prediction by our method is not due to selection of classification algorithm.

### **Survival signature in fresh frozen non-tumor liver**

We confirmed that the survival signature was readily detectable in a publicly available, independent dataset of fresh frozen non-tumor liver tissues (GSE6764)

**(Supplementary Figure 13).** Prediction was performed using the nearest template prediction method (see description in **Supplementary Appendix**).

**Patient survival in validation set according to geographic site**

A trend toward survival separation was also seen within each geographic site in the validation set (i.e., U.S., Spain and Italy), although this did not reach statistical significance due to the small sample size and/or insufficient follow-up time in each site (**Supplementary Figure 14**).

## References

1. Fan JB, Yeakley JM, Bibikova M, et al. A versatile assay for high-throughput gene expression profiling on universal array matrices. *Genome Res* 2004;14(5):878-85.
2. Bibikova M, Talantov D, Chudin E, et al. Quantitative gene expression profiling in formalin-fixed, paraffin-embedded tissues using universal bead arrays. *Am J Pathol* 2004;165(5):1799-807.
3. Ramaswamy S, Tamayo P, Rifkin R, et al. Multiclass cancer diagnosis using tumor gene expression signatures. *Proc Natl Acad Sci U S A* 2001;98(26):15149-54.
4. Su AI, Wiltshire T, Batalov S, et al. A gene atlas of the mouse and human protein-encoding transcriptomes. *Proc Natl Acad Sci U S A* 2004;101(16):6062-7.
5. Workman C, Jensen LJ, Jarmer H, et al. A new non-linear normalization method for reducing variability in DNA microarray experiments. *Genome Biol* 2002;3(9):research0048.
6. Bruix J, Sherman M. Management of hepatocellular carcinoma. *Hepatology* 2005;42(5):1208-36.
7. Imamura H, Matsuyama Y, Tanaka E, et al. Risk factors contributing to early and late phase intrahepatic recurrence of hepatocellular carcinoma after hepatectomy. *J Hepatol* 2003;38(2):200-7.
8. Bair E, Tibshirani R. Semi-supervised methods to predict patient survival from gene expression data. *PLoS Biol* 2004;2(4):E108.
9. Significance Analysis of Microarrays: Users manual, <http://www-stat.stanford.edu/~tibs/SAM/sam.pdf>.
10. Reiner A, Yekutieli D, Benjamini Y. Identifying differentially expressed genes using false discovery rate controlling procedures. *Bioinformatics* 2003;19(3):368-75.
11. Subramanian A, Tamayo P, Mootha VK, et al. Gene set enrichment analysis: a knowledge-based approach for interpreting genome-wide expression profiles. *Proc Natl Acad Sci U S A* 2005;102(43):15545-50.
12. Llovet JM, Burroughs A, Bruix J. Hepatocellular carcinoma. *Lancet* 2003;362(9399):1907-17.
13. Mazzaferro V, Romito R, Schiavo M, et al. Prevention of hepatocellular carcinoma recurrence with alpha-interferon after liver resection in HCV cirrhosis. *Hepatology* 2006;44(6):1543-54.
14. Lips EH, Dierssen JW, van Eijk R, et al. Reliable high-throughput genotyping and loss-of-heterozygosity detection in formalin-fixed, paraffin-embedded tumors using single nucleotide polymorphism arrays. *Cancer Res* 2005;65(22):10188-91.

**Supplementary Table 1**

Univariate Cox regression of clinical variables for patient survival (Training set)

| Variable                           | Category            | Hazard ratio | 95% confidence interval |      | p-value |
|------------------------------------|---------------------|--------------|-------------------------|------|---------|
|                                    |                     |              | low                     | high |         |
| Age                                | ≥ 60                | 0.75         | 0.37                    | 1.49 | 0.40    |
| Sex (male)                         | male                | 0.41         | 0.14                    | 1.16 | 0.09    |
| HBV                                |                     | 0.61         | 0.23                    | 1.57 | 0.30    |
| HCV                                |                     | 2.18         | 0.84                    | 5.69 | 0.11    |
| Alcohol                            |                     | 2.60         | 0.79                    | 8.59 | 0.12    |
| BCLC stage                         | B (vs. 0/A)         | 1.45         | 0.44                    | 4.77 | 0.54    |
|                                    | A/B (vs. 0)         | 1.90         | 0.86                    | 4.20 | 0.11    |
| Tumor diameter (cm)                | ≥ 3cm               | 1.21         | 0.60                    | 2.43 | 0.60    |
| Tumor differentiation              | Moderate (vs. Well) | 0.84         | 0.39                    | 1.85 | 0.67    |
|                                    | Poor (vs. Well)     | 0.67         | 0.23                    | 2.02 | 0.48    |
| Vascular invasion                  |                     | 2.11         | 0.50                    | 8.94 | 0.31    |
| Cirrhosis                          |                     | 1.90         | 0.78                    | 4.58 | 0.16    |
| AFP (ng/mL)                        | ≥ 100               | 0.95         | 0.47                    | 1.94 | 0.89    |
| Platelet count ( $\times 10^9/L$ ) | < 10.0              | 1.68         | 0.86                    | 3.28 | 0.13    |

HB: hepatitis B, HCV: hepatitis C virus, AFP: alpha-fetoprotein

**Supplementary Table 2**

Survival signature genes defined in adjacent liver tissue (defined in Training set)

## Genes correlated with poor survival

| Probe ID  | GeneID | Gene symbol | Description                                                                                    | Cox score |
|-----------|--------|-------------|------------------------------------------------------------------------------------------------|-----------|
| DAP1_5052 | 2488   | FSHB        | follicle stimulating hormone, beta polypeptide                                                 | 4.80      |
| DAP1_0153 | 6456   | SH3GL2      | SH3-domain GRB2-like 2                                                                         | 4.21      |
| DAP1_2390 | 23029  | RBM34       | RNA binding motif protein 34                                                                   | 4.19      |
| DAP3_3833 | 23397  | NCAPH       | non-SMC condensin I complex, subunit H                                                         | 4.02      |
| DAP1_0623 | 1950   | EGF         | epidermal growth factor (beta-urogastrone)                                                     | 3.97      |
| DAP1_5926 | 7204   | TRIO        | triple functional domain (PTPRF interacting)                                                   | 3.90      |
| DAP3_3842 | 1293   | COL6A3      | collagen, type VI, alpha 3                                                                     | 3.87      |
| DAP1_0171 | 3983   | ABLIM1      | actin binding LIM protein 1                                                                    | 3.86      |
| DAP3_0607 | 3680   | ITGA9       | integrin, alpha 9                                                                              | 3.81      |
| DAP4_5449 | 4922   | NTS         | neurotensin                                                                                    | 3.78      |
| DAP3_1324 | 5055   | SERPINB2    | serpin peptidase inhibitor, clade B (ovalbumin), member 2                                      | 3.69      |
| DAP3_1228 | 4316   | MMP7        | matrix metalloproteinase 7 (matrilysin, uterine)                                               | 3.59      |
| DAP3_4010 | 5593   | PRKG2       | protein kinase, cGMP-dependent, type II                                                        | 3.44      |
| DAP4_1888 | 9170   | EDG4        | endothelial differentiation, lysophosphatidic acid G-protein-coupled                           | 3.40      |
| DAP3_0208 | 4843   | NOS2A       | nitric oxide synthase 2A (inducible, hepatocytes)                                              | 3.33      |
| DAP1_4004 | 2043   | EPHA4       | EPH receptor A4                                                                                | 3.25      |
| DAP4_2216 | 6672   | SP100       | SP100 nuclear antigen                                                                          | 3.19      |
| DAP2_0010 | 2326   | FMO1        | flavin containing monooxygenase 1                                                              | 3.04      |
| DAP3_2729 | 2877   | GPX2        | glutathione peroxidase 2 (gastrointestinal)                                                    | 3.02      |
| DAP3_5508 | 496    | ATP4B       | ATPase, H+/K+ exchanging, beta polypeptide                                                     | 2.99      |
| DAP1_5176 | 8870   | IER3        | immediate early response 3                                                                     | 2.98      |
| DAP4_5988 | 7456   | WIPF1       | WAS/WASL interacting protein family, member 1                                                  | 2.98      |
| DAP1_3877 | 3489   | IGFBP6      | insulin-like growth factor binding protein 6                                                   | 2.93      |
| DAP1_0897 | 1501   | CTNND2      | catenin (cadherin-associated protein), delta 2 (neural plakophilin-related arm-repeat protein) | 2.92      |
| DAP3_5371 | 2200   | FBN1        | fibrillin 1                                                                                    | 2.91      |
| DAP4_5022 | 2629   | GBA         | glucosidase, beta; acid (includes glucosylceramidase)                                          | 2.85      |
| DAP1_4874 | 22858  | ICK         | intestinal cell (MAK-like) kinase                                                              | 2.85      |
| DAP1_3085 | 10523  | CHERP       | calcium homeostasis endoplasmic reticulum protein                                              | 2.81      |
| DAP3_3881 | 9734   | HDAC9       | histone deacetylase 9                                                                          | 2.81      |
| DAP3_1658 | 51406  | NOL7        | nucleolar protein 7, 27kDa                                                                     | 2.80      |
| DAP3_0609 | 8826   | IQGAP1      | IQ motif containing GTPase activating protein 1                                                | 2.79      |
| DAP3_3158 | 120    | ADD3        | adducin 3 (gamma)                                                                              | 2.79      |
| DAP3_3933 | 306    | ANXA3       | annexin A3                                                                                     | 2.78      |
| DAP2_5915 | 10362  | HMG20B      | high-mobility group 20B                                                                        | 2.76      |
| DAP1_0174 | 6558   | SLC12A2     | solute carrier family 12 (sodium/potassium/chloride transporters), member                      | 2.75      |
| DAP2_3448 | 1282   | COL4A1      | collagen, type IV, alpha 1                                                                     | 2.75      |
| DAP4_3126 | 1359   | CPA3        | carboxypeptidase A3 (mast cell)                                                                | 2.74      |
| DAP3_1093 | 3855   | KRT7        | keratin 7                                                                                      | 2.74      |
| DAP1_1741 | 5271   | SERPINB8    | serpin peptidase inhibitor, clade B (ovalbumin), member 8                                      | 2.69      |
| DAP3_1042 | 4791   | NFKB2       | nuclear factor of kappa light polypeptide gene enhancer in B-cells 2                           | 2.67      |
| DAP3_5816 | 165    | AEBP1       | AE binding protein 1                                                                           | 2.67      |
| DAP3_3879 | 7041   | TGFB1I1     | transforming growth factor beta 1 induced transcript 1                                         | 2.66      |
| DAP1_0509 | 2013   | EMP2        | epithelial membrane protein 2                                                                  | 2.63      |
| DAP2_3497 | 596    | BCL2        | B-cell CLL/lymphoma 2                                                                          | 2.63      |
| DAP3_2152 | 5698   | PSMB9       | proteasome (prosome, macropain) subunit, beta type, 9 (large multifunctional peptidase 2)      | 2.59      |
| DAP3_6062 | 10097  | ACTR2       | ARP2 actin-related protein 2 homolog (yeast)                                                   | 2.59      |
| DAP1_6137 | 780    | DDR1        | discoidin domain receptor family, member 1                                                     | 2.58      |
| DAP2_3913 | 6541   | SLC7A1      | solute carrier family 7 (cationic amino acid transporter, y+ system),                          | 2.56      |
| DAP4_2003 | 5420   | PODXL       | podocalyxin-like                                                                               | 2.56      |
| DAP1_5750 | 1307   | COL16A1     | collagen, type XVI, alpha 1                                                                    | 2.55      |
| DAP1_3284 | 10437  | IFI30       | interferon, gamma-inducible protein 30                                                         | 2.55      |
| DAP3_1596 | 9852   | EPM2AIP1    | EPM2A (laforin) interacting protein 1                                                          | 2.55      |
| DAP3_1678 | 301    | ANXA1       | annexin A1                                                                                     | 2.53      |
| DAP3_4123 | 6366   | CCL21       | chemokine (C-C motif) ligand 21                                                                | 2.47      |
| DAP3_1610 | 22856  | CHSY1       | carbohydrate (chondroitin) synthase 1                                                          | 2.45      |
| DAP1_4020 | 162    | AP1B1       | adaptor-related protein complex 1, beta 1 subunit                                              | 2.45      |
| DAP4_2797 | 7004   | TEAD4       | TEA domain family member 4                                                                     | 2.39      |
| DAP4_2406 | 54898  | ELOVL2      | elongation of very long chain fatty acids (FEN1/Elo2, SUR4/Elo3, yeast)-                       | 2.39      |
| DAP1_0054 | 6925   | TCF4        | transcription factor 4                                                                         | 2.38      |
| DAP3_1020 | 9819   | TSC22D2     | TSC22 domain family, member 2                                                                  | 2.38      |
| DAP4_2418 | 1847   | DUSP5       | dual specificity phosphatase 5                                                                 | 2.36      |

|           |       |         |                                                                    |      |
|-----------|-------|---------|--------------------------------------------------------------------|------|
| DAP3_5242 | 8030  | CCDC6   | coiled-coil domain containing 6                                    | 2.36 |
| DAP3_0973 | 962   | CD48    | CD48 molecule                                                      | 2.35 |
| DAP1_0901 | 10188 | TNK2    | tyrosine kinase, non-receptor, 2                                   | 2.35 |
| DAP3_1032 | 1601  | DAB2    | disabled homolog 2, mitogen-responsive phosphoprotein (Drosophila) | 2.35 |
| DAP2_3941 | 4017  | LOXL2   | lysyl oxidase-like 2                                               | 2.34 |
| DAP3_2205 | 6035  | RNASE1  | ribonuclease, RNase A family, 1 (pancreatic)                       | 2.34 |
| DAP4_2160 | 4026  | LPP     | LIM domain containing preferred translocation partner in lipoma    | 2.33 |
| DAP3_0038 | 7852  | CXCR4   | chemokine (C-X-C motif) receptor 4                                 | 2.33 |
| DAP3_1608 | 6586  | SLIT3   | slit homolog 3 (Drosophila)                                        | 2.31 |
| DAP3_0744 | 11259 | FILIP1L | filamin A interacting protein 1-like                               | 2.25 |
| DAP4_5839 | 6363  | CCL19   | chemokine (C-C motif) ligand 19                                    | 2.23 |
| DAP3_5744 | 11214 | AKAP13  | A kinase (PRKA) anchor protein 13                                  | 2.23 |

#### Genes correlated with good survival

| Probe ID  | GeneID | Gene symbol | Description                                                                                                                    | Cox score |
|-----------|--------|-------------|--------------------------------------------------------------------------------------------------------------------------------|-----------|
| DAP3_4190 | 223    | ALDH9A1     | aldehyde dehydrogenase 9 family, member A1                                                                                     | -3.34     |
| DAP4_0296 | 7276   | TTR         | transthyretin (prealbumin, amyloidosis type I)                                                                                 | -3.27     |
| DAP1_5588 | 6018   | RLF         | rearranged L-myc fusion                                                                                                        | -3.23     |
| DAP4_3479 | 3612   | IMPA1       | inositol(myo)-1(or 4)-monophosphatase 1                                                                                        | -3.22     |
| DAP3_2208 | 5207   | PFKFB1      | 6-phosphofructo-2-kinase/fructose-2,6-biphosphatase 1                                                                          | -3.22     |
| DAP3_1951 | 6296   | ACSM3       | acyl-CoA synthetase medium-chain family member 3                                                                               | -3.21     |
| DAP4_2813 | 151    | ADRA2B      | adrenergic, alpha-2B-, receptor                                                                                                | -3.19     |
| DAP1_3979 | 5771   | PTPN2       | protein tyrosine phosphatase, non-receptor type 2                                                                              | -3.12     |
| DAP3_1558 | 5691   | PSMB3       | proteasome (prosome, macropain) subunit, beta type, 3                                                                          | -3.09     |
| DAP3_2216 | 5502   | PPP1R1A     | protein phosphatase 1, regulatory (inhibitor) subunit 1A                                                                       | -3.07     |
| DAP3_0210 | 27346  | TMEM97      | transmembrane protein 97                                                                                                       | -3.06     |
| DAP2_4247 | 5313   | PKLR        | pyruvate kinase, liver and RBC                                                                                                 | -3.01     |
| DAP3_2434 | 9252   | RPS6KA5     | ribosomal protein S6 kinase, 90kDa, polypeptide 5                                                                              | -3.00     |
| DAP1_0453 | 1528   | CYB5A       | cytochrome b5 type A (microsomal)                                                                                              | -2.96     |
| DAP4_3541 | 6447   | SCG5        | secretogranin V (7B2 protein)                                                                                                  | -2.93     |
| DAP1_1650 | 25828  | TXN2        | thioredoxin 2                                                                                                                  | -2.90     |
| DAP2_1608 | 5340   | PLG         | plasminogen                                                                                                                    | -2.88     |
| DAP3_2733 | 6309   | SC5DL       | sterol-C5-desaturase (ERG3 delta-5-desaturase homolog, S. cerevisiae)-                                                         | -2.87     |
| DAP4_3933 | 367    | AR          | androgen receptor (dihydrotestosterone receptor; testicular feminization; spinal and bulbar muscular atrophy; Kennedy disease) | -2.84     |
| DAP3_5880 | 3479   | IGF1        | insulin-like growth factor 1 (somatomedin C)                                                                                   | -2.84     |
| DAP1_1983 | 8802   | SUCLG1      | succinate-CoA ligase, GDP-forming, alpha subunit                                                                               | -2.84     |
| DAP3_5885 | 23498  | HAAO        | 3-hydroxyanthranilate 3,4-dioxygenase                                                                                          | -2.83     |
| DAP2_6048 | 735    | C9          | complement component 9                                                                                                         | -2.83     |
| DAP4_1959 | 9013   | TAFIC       | TATA box binding protein (TBP)-associated factor, RNA polymerase I, C, 110kDa                                                  | -2.82     |
| DAP4_2356 | 1371   | CPOX        | coproporphyrinogen oxidase                                                                                                     | -2.82     |
| DAP4_5179 | 7507   | XPA         | xeroderma pigmentosum, complementation group A                                                                                 | -2.82     |
| DAP4_0915 | 3026   | HABP2       | hyaluronan binding protein 2                                                                                                   | -2.81     |
| DAP3_3625 | 2690   | GHR         | growth hormone receptor                                                                                                        | -2.77     |
| DAP4_1564 | 5105   | PCK1        | phosphoenolpyruvate carboxykinase 1 (soluble)                                                                                  | -2.76     |
| DAP2_1588 | 6718   | AKR1D1      | aldo-keto reductase family 1, member D1 (delta 4-3-ketosteroid-5-beta-                                                         | -2.76     |
| DAP3_1407 | 128    | ADH5        | alcohol dehydrogenase 5 (class III), chi polypeptide                                                                           | -2.75     |
| DAP3_5846 | 16     | AARS        | alanyl-tRNA synthetase                                                                                                         | -2.70     |
| DAP4_1895 | 732    | C8B         | complement component 8, beta polypeptide                                                                                       | -2.69     |
| DAP1_2114 | 51237  | MGC29506    | NA                                                                                                                             | -2.67     |
| DAP4_3262 | 10159  | ATP6AP2     | ATPase, H <sup>+</sup> transporting, lysosomal accessory protein 2                                                             | -2.67     |
| DAP4_2906 | 9732   | DOCK4       | dedicator of cytokinesis 4                                                                                                     | -2.66     |
| DAP4_4262 | 5627   | PROS1       | protein S (alpha)                                                                                                              | -2.66     |
| DAP4_5591 | 7709   | ZBTB17      | zinc finger and BTB domain containing 17                                                                                       | -2.65     |
| DAP1_2989 | 1603   | DAD1        | defender against cell death 1                                                                                                  | -2.65     |
| DAP4_0781 | 1678   | TIMM8A      | translocase of inner mitochondrial membrane 8 homolog A (yeast)                                                                | -2.65     |
| DAP3_5291 | 3155   | HMGCL       | 3-hydroxymethyl-3-methylglutaryl-Coenzyme A lyase (hydroxymethylglutaricaciduria)                                              | -2.65     |
| DAP3_4919 | 725    | C4BPB       | complement component 4 binding protein, beta                                                                                   | -2.62     |
| DAP4_5846 | 7189   | TRAF6       | TNF receptor-associated factor 6                                                                                               | -2.62     |
| DAP1_0147 | 1967   | EIF2B1      | eukaryotic translation initiation factor 2B, subunit 1 alpha, 26kDa                                                            | -2.61     |
| DAP1_0559 | 3990   | LIPC        | lipase, hepatic                                                                                                                | -2.60     |
| DAP4_5383 | 10026  | PIGK        | phosphatidylinositol glycan anchor biosynthesis, class K                                                                       | -2.60     |
| DAP4_5653 | 80344  | WDR23       | WD repeat domain 23                                                                                                            | -2.59     |
| DAP4_0010 | 5982   | RFC2        | replication factor C (activator 1) 2, 40kDa                                                                                    | -2.58     |
| DAP4_5452 | 2915   | GRM5        | glutamate receptor, metabotropic 5                                                                                             | -2.56     |
| DAP3_1646 | 6391   | SDHC        | succinate dehydrogenase complex, subunit C, integral membrane protein,                                                         | -2.55     |

|           |        |          |                                                                                                                                                            |       |
|-----------|--------|----------|------------------------------------------------------------------------------------------------------------------------------------------------------------|-------|
| DAP3_2354 | 2073   | ERCC5    | excision repair cross-complementing rodent repair deficiency, complementation group 5 (xeroderma pigmentosum, complementation group G (Cockayne syndrome)) | -2.54 |
| DAP1_2179 | 2158   | F9       | coagulation factor IX (plasma thromboplastic component, Christmas disease, hemophilia B)                                                                   | -2.54 |
| DAP2_2062 | 157567 | ANKRD46  | ankyrin repeat domain 46                                                                                                                                   | -2.54 |
| DAP3_2994 | 417    | ART1     | ADP-ribosyltransferase 1                                                                                                                                   | -2.54 |
| DAP3_1761 | 1486   | CTBS     | chitinase, di-N-acetyl-                                                                                                                                    | -2.54 |
| DAP3_3022 | 2542   | SLC37A4  | solute carrier family 37 (glucose-6-phosphate transporter), member 4                                                                                       | -2.53 |
| DAP4_3697 | 211    | ALAS1    | aminolevulinic acid, delta-, synthase 1                                                                                                                    | -2.53 |
| DAP4_5013 | 27072  | VPS41    | vacuolar protein sorting 41 homolog (S. cerevisiae)                                                                                                        | -2.51 |
| DAP3_1312 | 2642   | GCGR     | glucagon receptor                                                                                                                                          | -2.51 |
| DAP1_5069 | 10694  | CCT8     | chaperonin containing TCP1, subunit 8 (theta)                                                                                                              | -2.51 |
| DAP1_0656 | 25874  | BRP44    | brain protein 44                                                                                                                                           | -2.50 |
| DAP1_5381 | 2868   | GRK4     | G protein-coupled receptor kinase 4                                                                                                                        | -2.50 |
| DAP4_1861 | 3336   | HSPE1    | heat shock 10kDa protein 1 (chaperonin 10)                                                                                                                 | -2.50 |
| DAP2_5268 | 79731  | NARS2    | asparaginyl-tRNA synthetase 2, mitochondrial (putative)                                                                                                    | -2.49 |
| DAP1_5672 | 667    | DST      | dystonin                                                                                                                                                   | -2.49 |
| DAP1_5518 | 27032  | ATP2C1   | ATPase, Ca <sup>++</sup> transporting, type 2C, member 1                                                                                                   | -2.48 |
| DAP4_3497 | 10327  | AKR1A1   | aldo-keto reductase family 1, member A1 (aldehyde reductase)                                                                                               | -2.48 |
| DAP1_1085 | 2010   | EMD      | emerin (Emery-Dreifuss muscular dystrophy)                                                                                                                 | -2.47 |
| DAP4_5050 | 799    | CALCR    | calcitonin receptor                                                                                                                                        | -2.45 |
| DAP3_4223 | 22839  | DLGAP4   | discs, large (Drosophila) homolog-associated protein 4                                                                                                     | -2.45 |
| DAP4_3111 | 6240   | RRM1     | ribonucleotide reductase M1 polypeptide                                                                                                                    | -2.44 |
| DAP4_3810 | 29937  | NENF     | neuron derived neurotrophic factor                                                                                                                         | -2.44 |
| DAP1_3440 | 29887  | SNX10    | sorting nexin 10                                                                                                                                           | -2.44 |
| DAP3_5257 | 5372   | PMM1     | phosphomannomutase 1                                                                                                                                       | -2.44 |
| DAP1_5842 | 6999   | TDO2     | tryptophan 2,3-dioxygenase                                                                                                                                 | -2.43 |
| DAP4_3363 | 2944   | GSTM1    | glutathione S-transferase M1                                                                                                                               | -2.43 |
| DAP1_5123 | 6721   | SREBF2   | sterol regulatory element binding transcription factor 2                                                                                                   | -2.42 |
| DAP4_0140 | 26469  | PTPN18   | protein tyrosine phosphatase, non-receptor type 18 (brain-derived)                                                                                         | -2.42 |
| DAP3_1623 | 27163  | ASAH1    | N-acylsphingosine amidohydrolase (acid ceramidase)-like                                                                                                    | -2.41 |
| DAP2_4928 | 5336   | PLCG2    | phospholipase C, gamma 2 (phosphatidylinositol-specific)                                                                                                   | -2.41 |
| DAP3_5959 | 3760   | KCNJ3    | potassium inwardly-rectifying channel, subfamily J, member 3                                                                                               | -2.40 |
| DAP3_1753 | 5833   | PCYT2    | phosphate cytidylyltransferase 2, ethanolamine                                                                                                             | -2.40 |
| DAP4_4304 | 2705   | GJB1     | gap junction protein, beta 1, 32kDa                                                                                                                        | -2.39 |
| DAP3_5067 | 7108   | TM7SF2   | transmembrane 7 superfamily member 2                                                                                                                       | -2.39 |
| DAP4_5379 | 8991   | SELENBP1 | selenium binding protein 1                                                                                                                                 | -2.38 |
| DAP4_3066 | 316    | AOX1     | aldehyde oxidase 1                                                                                                                                         | -2.37 |
| DAP3_2882 | 10444  | ZER1     | zer-1 homolog (C. elegans)                                                                                                                                 | -2.37 |
| DAP4_6012 | 130    | ADH6     | alcohol dehydrogenase 6 (class V)                                                                                                                          | -2.36 |
| DAP3_5076 | 2956   | MSH6     | mutS homolog 6 (E. coli)                                                                                                                                   | -2.36 |
| DAP2_3569 | 8671   | SLC4A4   | solute carrier family 4, sodium bicarbonate cotransporter, member 4                                                                                        | -2.34 |
| DAP3_3988 | 9097   | USP14    | ubiquitin specific peptidase 14 (tRNA-guanine transglycosylase)                                                                                            | -2.34 |
| DAP3_6123 | 727    | C5       | complement component 5                                                                                                                                     | -2.32 |
| DAP4_0949 | 5893   | RAD52    | RAD52 homolog (S. cerevisiae)                                                                                                                              | -2.32 |
| DAP4_0979 | 116496 | FAM129A  | family with sequence similarity 129, member A                                                                                                              | -2.31 |
| DAP4_2296 | 10458  | BAIAP2   | BAI1-associated protein 2                                                                                                                                  | -2.31 |
| DAP1_1550 | 6744   | SSFA2    | sperm specific antigen 2                                                                                                                                   | -2.30 |
| DAP2_6140 | 5446   | PON3     | paraoxonase 3                                                                                                                                              | -2.30 |
| DAP3_2198 | 2646   | GCKR     | glucokinase (hexokinase 4) regulator                                                                                                                       | -2.30 |
| DAP3_3783 | 1385   | CREB1    | cAMP responsive element binding protein 1                                                                                                                  | -2.30 |
| DAP3_3049 | 23316  | CUTL2    | cut-like 2 (Drosophila)                                                                                                                                    | -2.29 |
| DAP1_5546 | 6427   | SFRS2    | splicing factor, arginine/serine-rich 2                                                                                                                    | -2.28 |
| DAP4_0984 | 3156   | HMGCR    | 3-hydroxy-3-methylglutaryl-Coenzyme A reductase                                                                                                            | -2.28 |
| DAP3_5468 | 2677   | GGCX     | gamma-glutamyl carboxylase                                                                                                                                 | -2.27 |
| DAP2_5898 | 1555   | CYP2B6   | cytochrome P450, family 2, subfamily B, polypeptide 6                                                                                                      | -2.26 |
| DAP4_3279 | 7739   | ZNF185   | zinc finger protein 185 (LIM domain)                                                                                                                       | -2.26 |
| DAP3_1562 | 378    | ARF4     | ADP-ribosylation factor 4                                                                                                                                  | -2.23 |
| DAP4_3503 | 10965  | ACOT2    | acyl-CoA thioesterase 2                                                                                                                                    | -2.22 |
| DAP3_0889 | 513    | ATP5D    | ATP synthase, H <sup>+</sup> transporting, mitochondrial F1 complex, delta subunit                                                                         | -2.22 |
| DAP2_4148 | 1369   | CPN1     | carboxypeptidase N, polypeptide 1                                                                                                                          | -2.20 |
| DAP2_1935 | 5331   | PLCB3    | phospholipase C, beta 3 (phosphatidylinositol-specific)                                                                                                    | -2.20 |
| DAP3_2137 | 3642   | INSM1    | insulinoma-associated 1                                                                                                                                    | -2.18 |
| DAP4_3027 | 5442   | POLRMT   | polymerase (RNA) mitochondrial (DNA directed)                                                                                                              | -2.14 |
| DAP3_5700 | 11145  | HRASLS3  | HRAS-like suppressor 3                                                                                                                                     | -2.13 |

**Supplementary Table 3**

Functional annotation of Survival signature by Gene Set Enrichment Analysis (Training set)  
 (For details of each gene set, click the name for the link to MSigDB gene set annotation page)

**(a) Gene sets correlated with poor survival**

| Experimental perturbation gene set              | # genes | NES  | FDR   |
|-------------------------------------------------|---------|------|-------|
| <a href="#">IFNA_HCMV_6HRS_UP</a>               | 56      | 2.30 | 0.000 |
| <a href="#">CROONQUIST_IL6_STROMA_UP</a>        | 34      | 2.19 | 0.003 |
| <a href="#">SANA_IFNG_ENDOTHELIAL_UP</a>        | 30      | 1.98 | 0.034 |
| <a href="#">IFN_ALPHA_UP</a>                    | 30      | 1.96 | 0.029 |
| <a href="#">SANA_TNFA_ENDOTHELIAL_UP</a>        | 46      | 1.96 | 0.024 |
| <a href="#">RADAEVA_IFNA_UP</a>                 | 29      | 1.96 | 0.020 |
| <a href="#">ADIP_HUMAN_DN</a>                   | 18      | 1.95 | 0.018 |
| <a href="#">IFNA_UV-CMV_COMMON_HCMV_6HRS_UP</a> | 33      | 1.94 | 0.019 |
| <a href="#">O6BG_RESIST_MEDULLOBLASTOMA_DN</a>  | 24      | 1.90 | 0.025 |
| <a href="#">HADDAD_HSC_CD10_UP</a>              | 165     | 1.86 | 0.034 |
| <a href="#">TGFBETA_ALL_UP</a>                  | 50      | 1.85 | 0.035 |
| <a href="#">ZUCCHI_EPITHELIAL_DN</a>            | 34      | 1.83 | 0.038 |
| <a href="#">BRG1_ALAB_DN</a>                    | 18      | 1.83 | 0.036 |
| <a href="#">CROONQUIST_RAS_STROMA_DN</a>        | 18      | 1.81 | 0.041 |
| <a href="#">HINATA_NFKB_UP</a>                  | 91      | 1.71 | 0.087 |

| Literture-based pathway gene set              | # genes | NES  | FDR   |
|-----------------------------------------------|---------|------|-------|
| <a href="#">INFLAMMATORY_RESPONSE_PATHWAY</a> | 25      | 1.90 | 0.023 |

**(b) Gene sets correlated with good survival**

| Experimental perturbation gene set              | # genes | NES   | FDR   |
|-------------------------------------------------|---------|-------|-------|
| <a href="#">FETAL_LIVER_VS_ADULT_LIVER_GNF2</a> | 44      | -2.20 | 0.002 |

| Literture-based pathway gene set                          | # genes | NES   | FDR   |
|-----------------------------------------------------------|---------|-------|-------|
| <a href="#">ANDROGEN_AND_ESTROGEN_METABOLISM</a>          | 21      | -2.17 | 0.001 |
| <a href="#">FATTY_ACID_METABOLISM</a>                     | 57      | -2.15 | 0.001 |
| <a href="#">TRYPTOPHAN_METABOLISM</a>                     | 44      | -2.08 | 0.002 |
| <a href="#">BILE_ACID_BIOSYNTHESIS</a>                    | 17      | -2.02 | 0.004 |
| <a href="#">ELECTRON_TRANSPORT_CHAIN</a>                  | 48      | -2.01 | 0.003 |
| <a href="#">VALINE_LEUCINE_AND_ISOLEUCINE_DEGRADATION</a> | 23      | -1.99 | 0.003 |
| <a href="#">INOSITOL_PHOSPHATE_METABOLISM</a>             | 19      | -1.90 | 0.007 |
| <a href="#">BUTANOATE_METABOLISM</a>                      | 20      | -1.89 | 0.006 |
| <a href="#">BETA_ALANINE_METABOLISM</a>                   | 21      | -1.81 | 0.014 |
| <a href="#">PYRUVATE_METABOLISM</a>                       | 26      | -1.75 | 0.023 |
| <a href="#">GLYCINE_SERINE_AND_THREONINE_METABOLISM</a>   | 23      | -1.74 | 0.023 |
| <a href="#">GAMMA_HEXACHLOROCYCLOHEXANE_DEGRADATION</a>   | 25      | -1.71 | 0.028 |
| <a href="#">GLYCEROLIPID_METABOLISM</a>                   | 27      | -1.70 | 0.028 |

NES: normalized enrichment score, FDR: false discovery rate

**Supplementary Table 4**

Gene expression-based survival prediction and histological inflammation of the liver  
(Training set)

| Prediction    | Inflammation |      |          |        |
|---------------|--------------|------|----------|--------|
|               | None         | Mild | Moderate | Severe |
| Poor survival | 2            | 11   | 9        | 5      |
| Good survival | 4            | 17   | 22       | 11     |

Fisher's exact test,  $p=0.89$

Scored according to Batts K, Ludwig J. Am J Surg Pathol 19:1409,1995

**Supplementary Table 5**

Univariate Cox regression analysis of clinical risk factors (Validation set)

## Early recurrence

| Variable          | Hazard ratio | 95% CI |      | p-value |
|-------------------|--------------|--------|------|---------|
|                   |              | low    | high |         |
| Multinodularity   | 1.95         | 1.13   | 3.37 | 0.02    |
| Vascular invasion | 1.72         | 1.11   | 2.66 | 0.02    |
| AFP > 100 ng/mL   | 1.94         | 1.21   | 3.12 | 0.006   |

## Late recurrence

| Variable          | Hazard ratio | 95% CI |      | p-value |
|-------------------|--------------|--------|------|---------|
|                   |              | low    | high |         |
| Multinodularity   | 2.10         | 0.73   | 6.06 | 0.17    |
| Vascular invasion | 0.85         | 0.38   | 1.92 | 0.70    |
| AFP > 100 ng/mL   | 0.45         | 0.17   | 1.19 | 0.11    |

## Survival

| Variable          | Hazard ratio | 95% CI |      | p-value |
|-------------------|--------------|--------|------|---------|
|                   |              | low    | high |         |
| Multinodularity   | 1.66         | 0.77   | 3.59 | 0.19    |
| Vascular invasion | 2.05         | 1.12   | 3.76 | 0.02    |
| AFP > 100 ng/mL   | 2.10         | 1.08   | 4.07 | 0.03    |

AFP: alpha-fetoprotein

**Supplementary Table 6**

Multivariate Cox regression: subgroup analysis (Validation set)

Late recurrence (longer follow-up patients, n=167)

| Variable                  | Hazard ratio | 95% CI |      | p-value |
|---------------------------|--------------|--------|------|---------|
|                           |              | low    | high |         |
| Late recurrence signature | 2.94         | 1.39   | 6.20 | 0.005   |

Late recurrence (BCLC  $\leq$  A, n=207)

| Variable                  | Hazard ratio | 95% CI |      | p-value |
|---------------------------|--------------|--------|------|---------|
|                           |              | low    | high |         |
| Late recurrence signature | 2.97         | 1.37   | 6.45 | 0.006   |

Survival (BCLC  $\leq$  A, n=207)

| Variable           | Hazard ratio | 95% CI |      | p-value |
|--------------------|--------------|--------|------|---------|
|                    |              | low    | high |         |
| Survival signature | 1.93         | 0.87   | 4.28 | 0.10    |
| AFP > 100 ng/mL    | 2.30         | 1.04   | 5.05 | 0.04    |
| Vascular invasion  | 1.80         | 0.84   | 3.88 | 0.13    |

Survival (longer follow-up patients, BCLC  $\leq$  A, n=154)

| Variable           | Hazard ratio | 95% CI |      | p-value |
|--------------------|--------------|--------|------|---------|
|                    |              | low    | high |         |
| Survival signature | 2.04         | 0.91   | 4.59 | 0.08    |
| AFP > 100 ng/mL    | 2.13         | 0.95   | 4.76 | 0.07    |
| Vascular invasion  | 2.01         | 0.92   | 4.36 | 0.08    |

AFP: alpha-fetoprotein

**Supplementary Table 7A**

Clonality analysis of paired primary and recurrent HCC

| Case ID | "Heterozygous in recurrence" / "Homozygous in primary" | "Homozygous in recurrence" / "Heterozygous in primary" | Primary tumor subclass* | Recurrent tumor subclass* |
|---------|--------------------------------------------------------|--------------------------------------------------------|-------------------------|---------------------------|
| hcc_018 | 26% (562/2167)                                         | 25% (268/1086)                                         | S2                      | S1                        |
| hcc_044 | 6% (178/2887)                                          | 13% (156/1200)                                         | S1                      | S3                        |
| hcc_082 | 1% (31/3244)                                           | 10% (123/1205)                                         | S3                      | S2                        |
| hcc_075 | 9% (218/2548)                                          | 15% (171/1168)                                         | S2                      | S1                        |
| hcc_101 | 8% (168/2063)                                          | 32% (310/967)                                          | S2                      | S2                        |
| hcc_104 | -                                                      | -                                                      | S3                      | S1                        |

\*Molecular subclasses of HCC defined by a meta-analysis of published frozen sample-based microarray datasets (Hoshida et al. Manuscript in preparation).

"Heterozygous in recurrence" / "Homozygous in primary" in adjacent non-tumor liver tissues of hcc\_082, hcc\_075, and HeLa cells were 0.1% (4/3759), 0.6% (20/3275), and 0.3% (10/3701), respectively.

"Homozygous in recurrence" / "Heterozygous in primary" in adjacent non-tumor liver tissues of hcc\_082, hcc\_075, and HeLa cells were 0.6% (11/1869), 2.3% (38/1676), and 0.7% (8/1216), respectively.

**Supplementary Table 7B**

Clonality analysis of paired primary and recurrent/metastatic non-HCC tumors

| Cancer type   | "Heterozygous in recurrence" /<br>"Homozygous in primary" | "Homozygous in recurrence" /<br>"Heterozygous in primary" |
|---------------|-----------------------------------------------------------|-----------------------------------------------------------|
| Endometrial 1 | 0.1% (19/40897)                                           | 0.8% (124/15033)                                          |
| Endometrial 2 | 1.9% (1621/83369)                                         | 0.6% (160/24907)                                          |
| Endometrial 3 | 0.2% (198/82423)                                          | 0.9% (229/26372)                                          |
| Ovarian 1     | 1.9% (1686/90069)                                         | 1.7% (300/17747)                                          |
| Ovarian 2     | 1.3% (1182/91547)                                         | 3.3% (549/16621)                                          |
| Ovarian 3     | 0.3% (121/44828)                                          | 2.2% (218/10075)                                          |
| Ovarian 4     | 0.2% (103/43429)                                          | 4.5% (441/9781)                                           |
| Renal 1       | 1.6% (682/42699)                                          | 0.1% (13/13701)                                           |
| Renal 2       | 1.9% (796/42753)                                          | 0.1% (9/12720)                                            |
| Renal 3       | 0.1% (55/42518)                                           | 1.2% (157/13154)                                          |
| DLBCL 1       | 1.1% (6503/605724)                                        | 2.8% (6001/216597)                                        |
| DLBCL 2       | 0.9% (5361/598243)                                        | 2.2% (5089/228143)                                        |
| DLBCL 3       | 0.4% (2216/625092)                                        | 0.6% (1402/239662)                                        |
| DLBCL 4       | 1.0% (6377/618375)                                        | 2.0% (4525/222075)                                        |
| DLBCL 5       | 1.8% (10689/582552)                                       | 2.5% (5697/232207)                                        |
| DLBCL 6       | 0.6% (3773/600753)                                        | 6.1% (13368/219845)                                       |

DLBCL: diffuse large B-cell lymphoma

Endometrial, ovarian, and renal cancers were profiles on Afymetrix 500k SNP array.

DLBCL samples were profiled on Affymetrix SNP 6.0 array.

**Supplementary Table 8**

Datasets used to select Transcriptionally Informative Genes

| Tissue type              | Disease                              | # samples | Reference                                |
|--------------------------|--------------------------------------|-----------|------------------------------------------|
| Brain                    | Glioblastoma                         | 50        | Cancer Res 63;1602,2003                  |
|                          | Medulloblastoma                      | 60        | Nature 415;436,2002                      |
|                          | Medulloblastoma                      | 23        | Nature Genet 29;143,2001                 |
| Breast                   | Breast cancer                        | 73        | Unpublished                              |
|                          | Breast cancer                        | 49        | PNAS 98;11462,2001, Lancet 361;1590,2003 |
|                          | Breast cancer                        | 40        | Unpublished                              |
| Lung                     | Lung cancer                          | 62        | PNAS 98;13790,2001                       |
|                          | Lung cancer                          | 86        | Nature Med 8;816,2002                    |
| Stomach                  | Gastric cancer                       | 30        | Cancer Res 62;233,2003                   |
| Liver                    | Hepatocellular carcinoma             | 49        | Cancer Res 64;7263,2004                  |
|                          | Hepatocellular carcinoma             | 60        | Lancet 361;923,2003                      |
| Ovary                    | Ovarian cancer                       | 113       | Unpublished                              |
| Prostate                 | Prostate cancer                      | 102       | Cancer Cell 1;203,2002                   |
|                          | Prostate cancer                      | 120       | Unpublished                              |
|                          | Prostate cancer                      | 80        | Unpublished                              |
| Hematopoietic            | Diffuse large B-cell lymphoma        | 176       | Blood 105;1851,2005                      |
|                          | Diffuse large B-cell lymphoma        | 210       | Blood 102;3871,2003                      |
|                          | Acute myeloid/lymphoblastic leukemia | 52        | Unpublished                              |
|                          | Mixed-lineage leukemia               | 72        | Nature Genet 30;41,2002                  |
| Skin                     | Melanoma                             | 115       | Unpublished                              |
| Astrocyte                | Astrocytoma                          | 13        | Cancer Res 63;1865,2003                  |
| Cancer & normal tissues* | Cancer & normal tissues              | 280       | PNAS 98;15149,2001                       |
| Cancer tissues*          | Primary & metastatic cancers         | 76        | Nature Genet 33;49,2003                  |
| Normal tissues*          | Normal tissues                       | 158       | PNAS 101;6062,2004                       |
|                          |                                      | 2149      |                                          |

\*: Panel of multiple tissue types

**Supplementary Table 9**

Concordance in gene expression change (DHL4 vs. HeLa cell lines) between intact and FFPE-RNA on DASL assay

|                                            | All genes  | Fold change in fresh RNA |           |           |
|--------------------------------------------|------------|--------------------------|-----------|-----------|
|                                            |            | > 2-fold                 | > 5-fold  | > 10-fold |
| # genes DHL4 > HeLa in fresh RNA           | 3156       | 811                      | 185       | 93        |
| # genes with concordant change in FFPE RNA | 2282 (72%) | 687 (85%)                | 180 (97%) | 91 (98%)  |
| # genes with discordant change in FFPE RNA | 874 (28%)  | 124 (15%)                | 5 (3%)    | 2 (2%)    |
| # genes DHL4 < HeLa in fresh RNA           | 2988       | 1056                     | 339       | 138       |
| # genes with concordant change in FFPE RNA | 2135 (71%) | 905 (86%)                | 321 (95%) | 137 (99%) |
| # genes with discordant change in FFPE RNA | 853 (29%)  | 151 (14%)                | 18 (5%)   | 1 (1%)    |

**Supplementary Table 10**

Leave-one-out cross-validation error rates for outcome prediction using HCC tissue data (Training set).

| Prediction algorithm | Outcome  |            |
|----------------------|----------|------------|
|                      | Survival | Recurrence |
| CART                 | 40%      | 21%        |
| k-NN, 1 neighbor     | 41%      | 18%        |
| k-NN, 3 neighbors    | 43%      | 18%        |
| k-NN, 5 neighbors    | 31%      | 19%        |
| k-NN, 7 neighbors    | 36%      | 19%        |
| WV, 10 markers       | 38%      | 41%        |
| WV, 50 markers       | 48%      | 45%        |
| WV, 100 markers      | 49%      | 30%        |
| SVM                  | 43%      | 23%        |

CART: classification and regression trees,

k-NN: k-nearest neighbor,

WV: weighted voting,

SVM: support vector machine

## **Supplementary Figure legends**

### **Supplementary Figure 1**

Effect of missing gene expression signals by reducing the number of probes for each gene in the DASL assay. A: Missing signals by reducing the number of probes assigned for each gene. Left panel shows expression levels of 502 cancer-related genes (Cancer Panel, Illumina) computed as average of 3 independent probes for each gene. Right panel shows signals falling below the level of negative control probes (black bars) by randomly picking a single probe from the 3 probes representing each gene. B: Hierarchical clustering using 5 datasets generated by randomly picking 1 probe from the 3 probes. C: Comparison of rank of top HCC marker genes (top and bottom 20 genes) between 1-probe and 3-probe datasets.

### **Supplementary Figure 2**

A: Leave-one-out cross validation-based survival prediction using FFPE HCC tissues. B: Previously reported survival-predictive signature (Lee, et al. Hepatology 40:667,2004) recapitulated in the dataset (left panel) without association with survival (right panel).

### **Supplementary Figure 3**

A: Leave-one-out cross validation-based survival prediction using publicly available gene expression dataset of fresh frozen HCC tissues (n=67, NCBI Gene Expression Omnibus dataset accession # GSE9843). B: Previously reported survival-predictive signature (Lee, et al. Hepatology 40:667,2004) recapitulated in the dataset (left panel) without association with survival (right panel).

### **Supplementary Figure 4**

Smoothed tumor recurrence hazard over time after surgery for training (A) and validation (B) sets. There is no peak of early recurrence in training set.

### **Supplementary Figure 5**

Survival curves according to the grade of hepatitis activity (based on Batts and Ludwig. Am J Surg Pathol 19:1409,1995) in the training set.

### **Supplementary Figure 6**

Overall recurrence curves in the validation set according to the prediction made by the late recurrence-predictive signature (132 genes, A) and the overall recurrence-predictive signature (174 genes, B). C: Correlation between survival- and late recurrence-predictive signatures: genes on microarray were rank-ordered according to their correlation with survival time, and subset of late recurrence signature genes associated with higher (upper panel) or lower (lower panel) risk of late recurrence was separately evaluated for its overrepresentation on poor survival or good survival side in the rank-ordered gene list, respectively, using Gene Set Enrichment Analysis ( $p < 0.001$ , see **Supplementary Appendix**). Early recurrences ( $< 2$  years following resection) are censored in the analysis of late recurrence. Red and blue lines indicate prediction of higher and lower risk of late/overall recurrence, respectively.

### **Supplementary Figure 7**

Assessment of clonality between primary and recurrent tumors. A: The panel shows how many homozygous loci in the primary tumors appear to be heterozygous in paired recurrent tumors. B: The panel shows how many heterozygous loci in the primary tumors appear to be homozygous in paired recurrent tumors. DLBCL: diffuse large B-cell lymphoma.

### **Supplementary Figure 8**

“Present” gene expression signals in genome-wide microarray datasets profiling panels of multiple human tissue types. A: Panel of cancer tissues (PNAS 2001;98:15149, <http://www.broad.mit.edu/cancer/>). B: Panel of normal tissues (PNAS 2004;101:6062, <http://www.gnf.org/>). Red color indicates “present” (i.e., expressed) genes.

### **Supplementary Figure 9**

Selection process for 6,000 transcriptionally informative genes in the DASL assay. A: In each of previously generated 24 microarray datasets, coefficient of variation (CV) was calculated for each gene and summarized on to the list of NCBI RefSeq ID. B: The top 6,000 genes cover 70-90% of genes in microarray-based signatures (375 gene

sets) and literature-based molecular pathways (450 gene sets) collected in Molecular Signature Database (MSigDB), C: Age of FFPE blocks and %P-call in 10 prostate cancer samples. Red arrow head indicates samples fixed 24 years before RNA extraction; blue arrow head indicates a sample fixed 7 years before RNA extraction.

### **Supplementary Figure 10**

Quality assessment of DASL profile based on the proportion of “present” (i.e., expressed) genes (%P-call) in the training set. Correlation coefficient of each array to the “median” array was plotted against %P-call for tumor (left) and adjacent liver (right) profiles from the training set. For each tissue type, quality threshold was defined as a %P-call where the correlation starts to drop. Green lines indicate %P-call threshold of 65% and 70% for tumor and liver profiles, respectively. The same quality threshold was applied to the profiles from validation set.

### **Supplementary Figure 11**

Comparison of gene expression fold change between intact and FFPE-RNA.

### **Supplementary Figure 12**

Prediction of prostate cancer using the DASL profile of marker genes defined by a meta-analysis of published 7 frozen sample-based microarray datasets.

### **Supplementary Figure 13**

The survival signature in a publicly available independent dataset of fresh frozen non-tumor liver tissues (n=10).

### **Supplementary Figure 14**

Survival curves for three geographic sites in the validation set: US (n=88, median follow-up 2.4 years), Spain (n=45, median follow-up 3.1 years), and Italy (n=92, median follow-up 1.9 years). A: Overall survival. B: Survival curves according to the survival prediction. Red lines indicate poor survival prediction; blue lines indicate good survival prediction.

# Supplementary Figure 1A

A

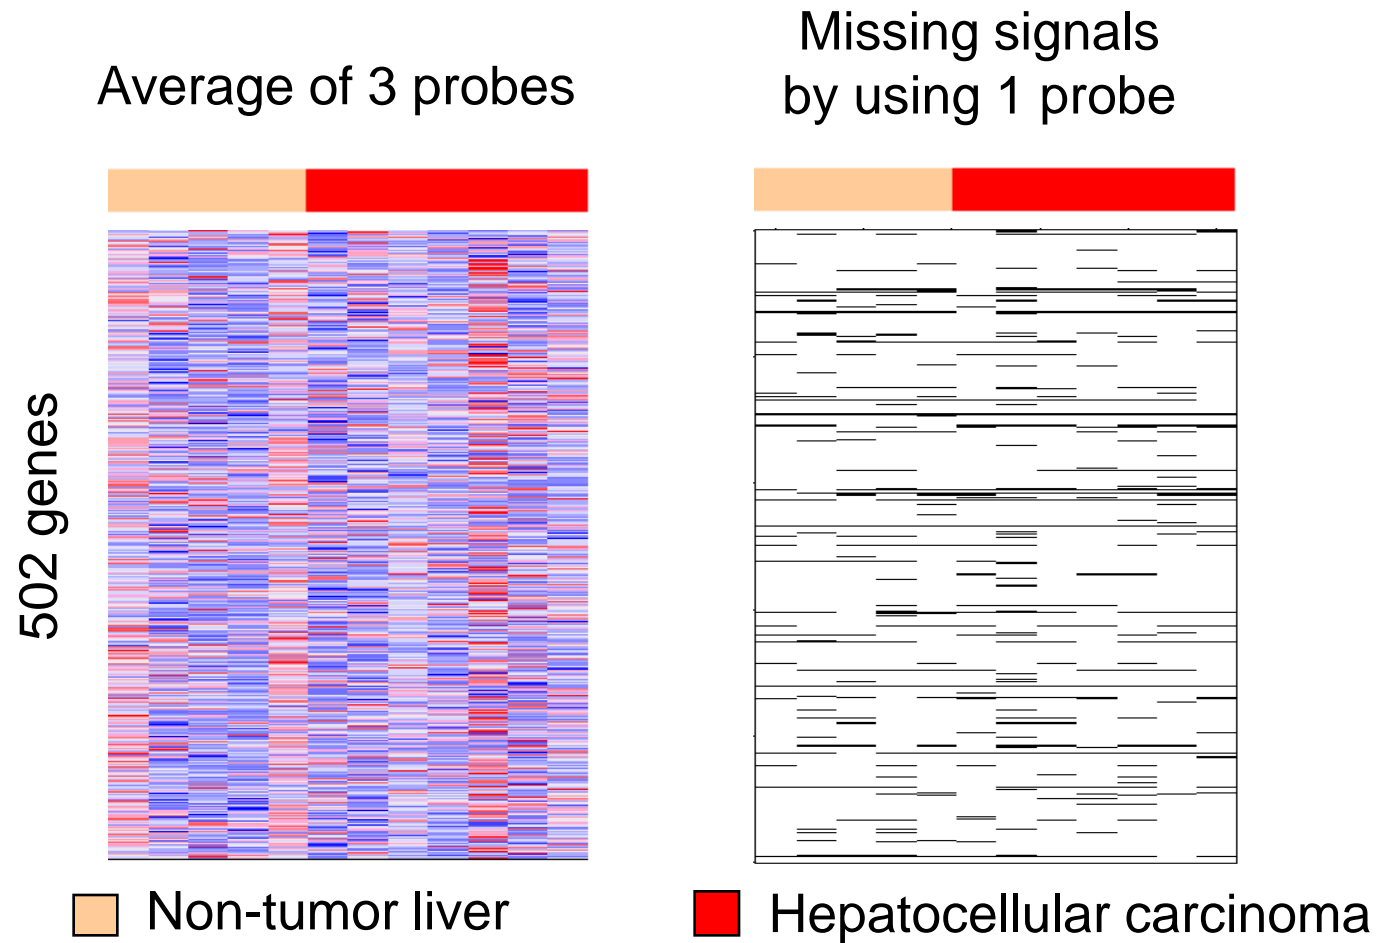

# Supplementary Figure 1B,C

B

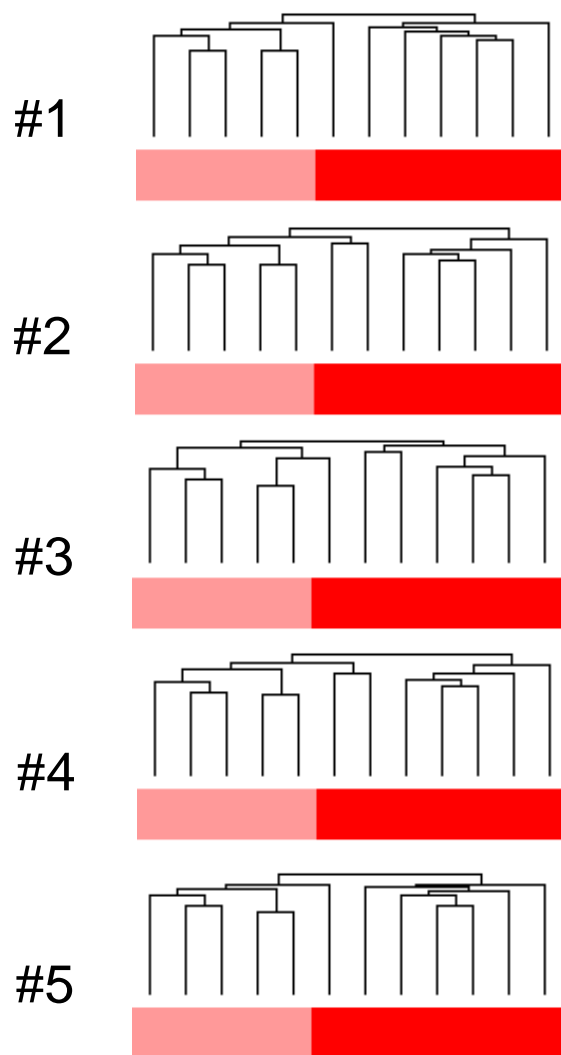

C

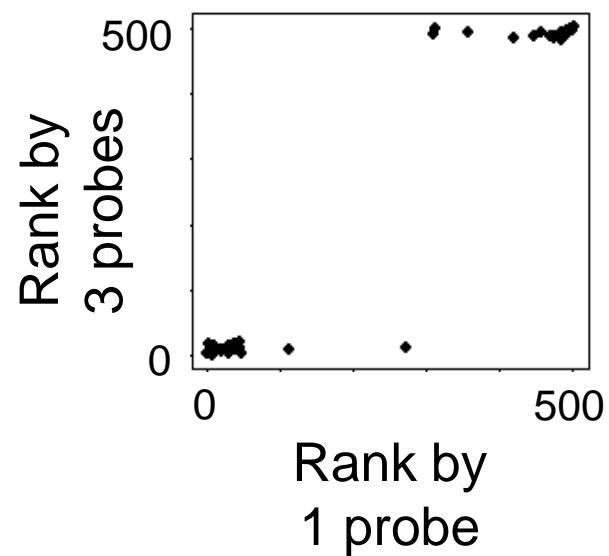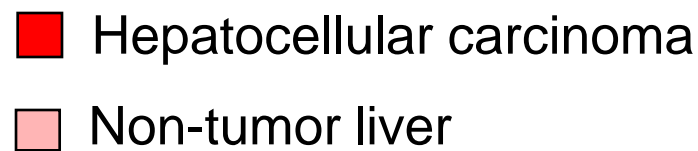

# Supplementary Figure 2

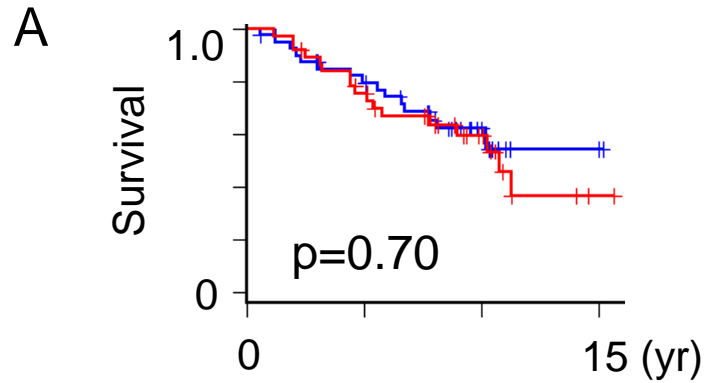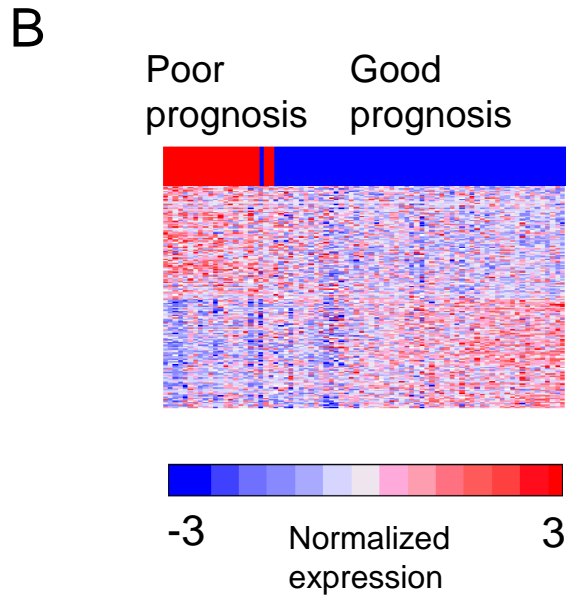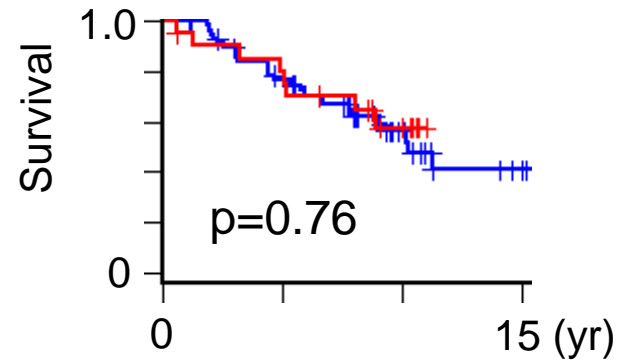

# Supplementary Figure 3

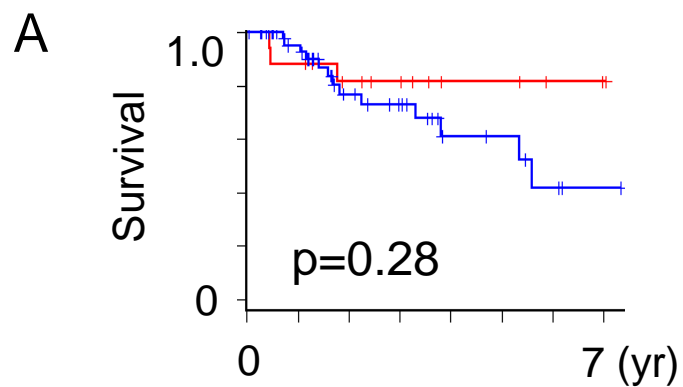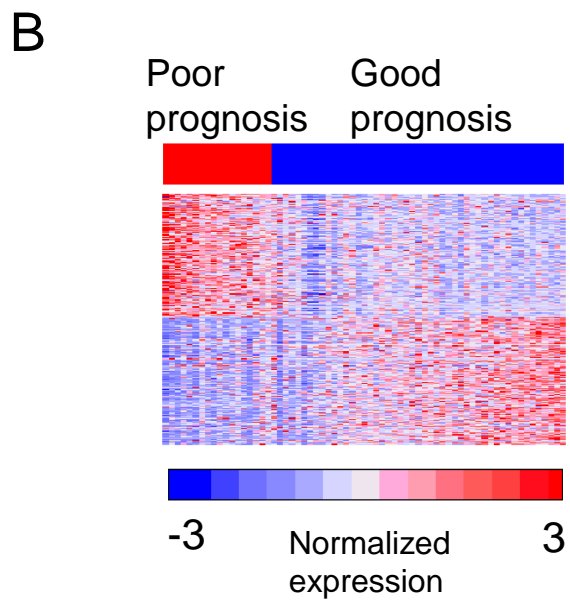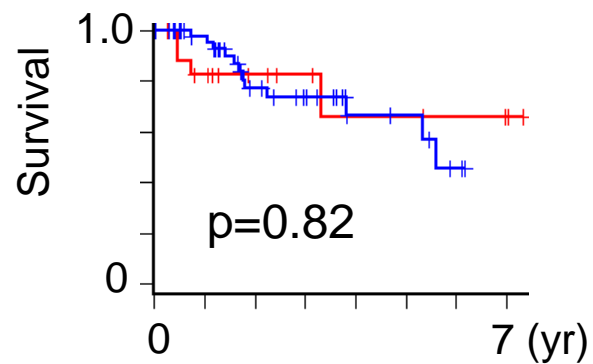

# Supplementary Figure 4

A

TRAINING SET

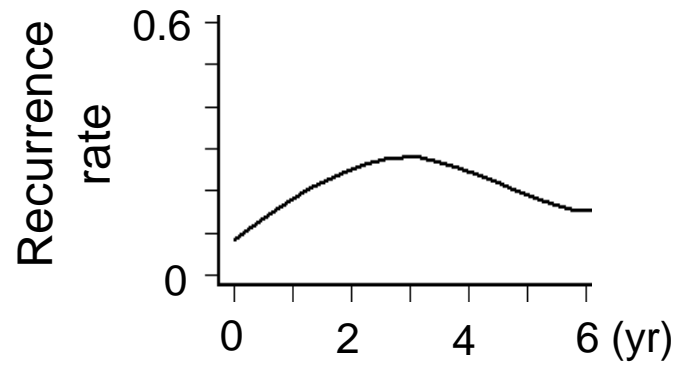

B

VALIDATION SET

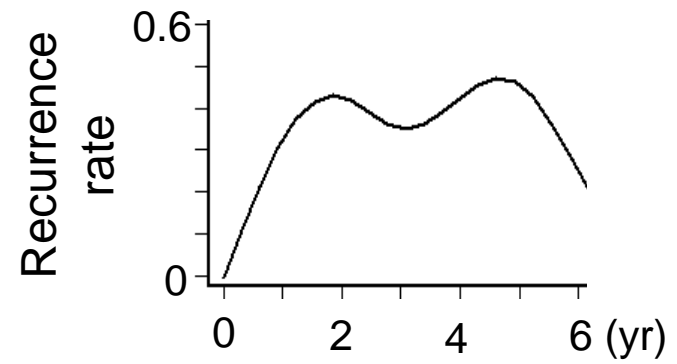

# Supplementary Figure 5

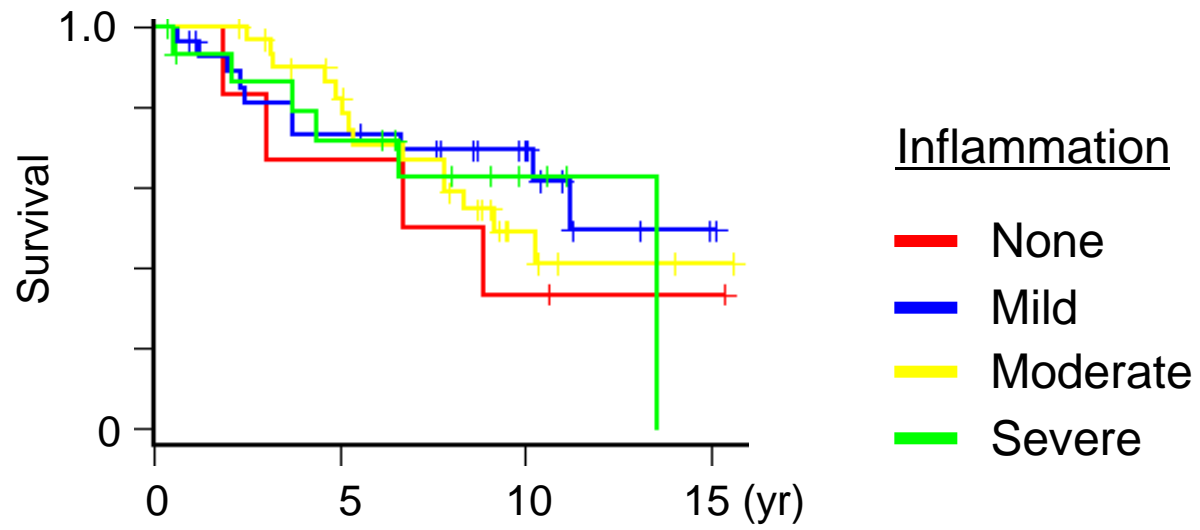

# Supplementary Figure 6

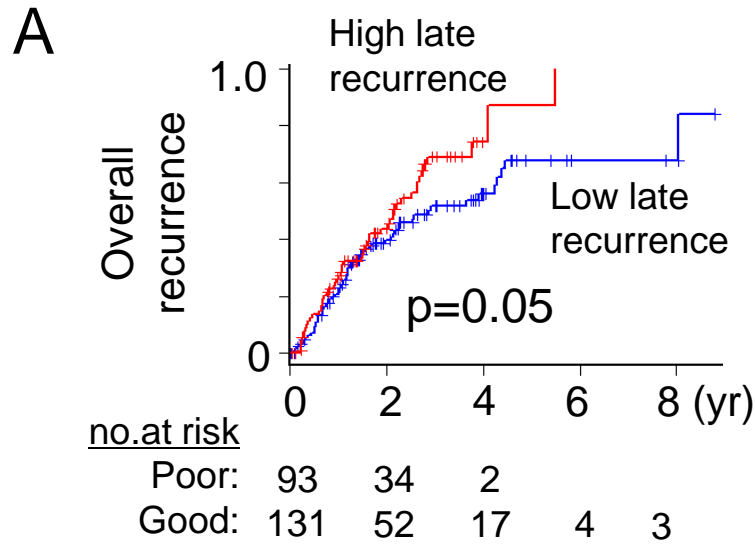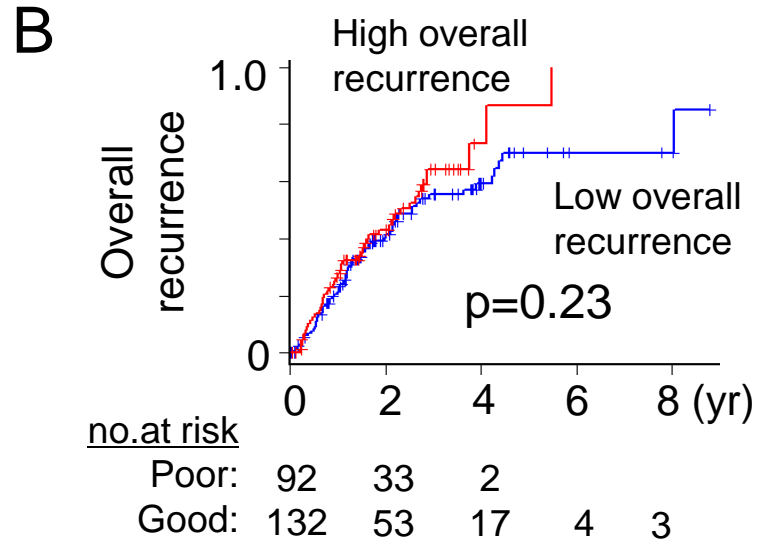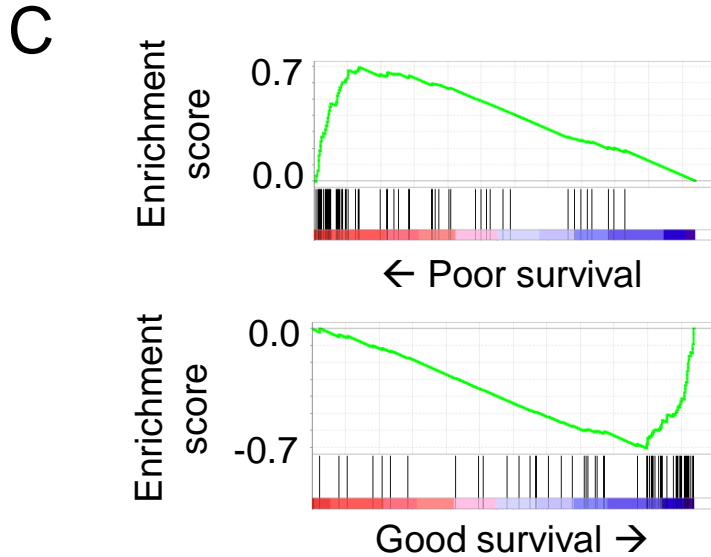

# Supplementary Figure 7

A

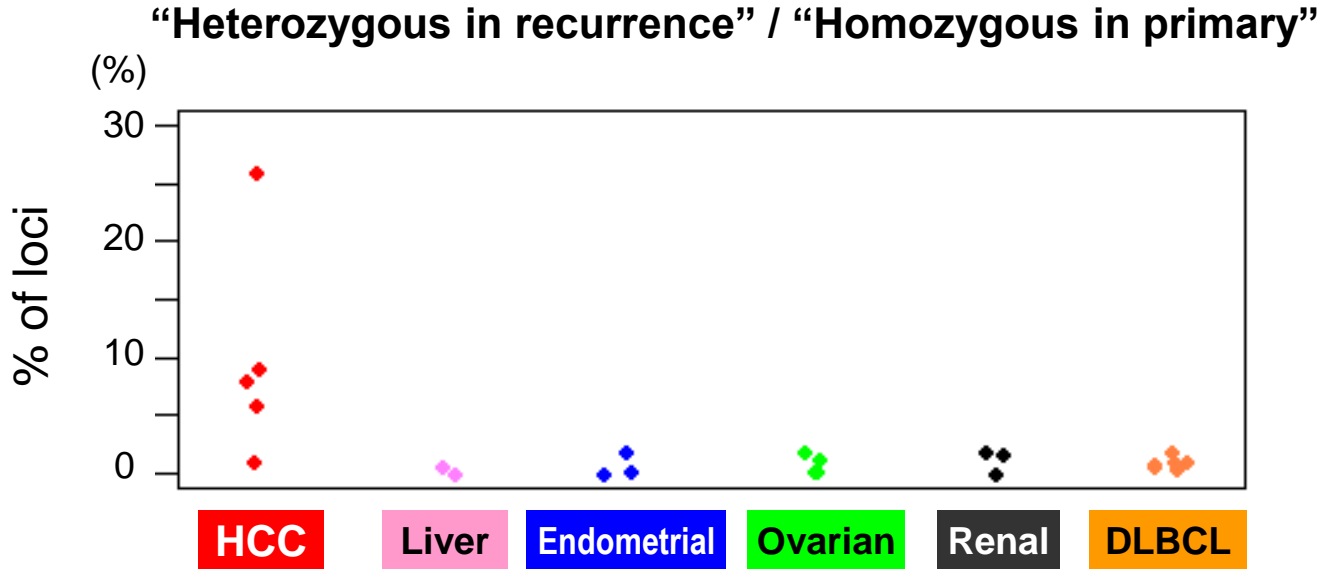

B

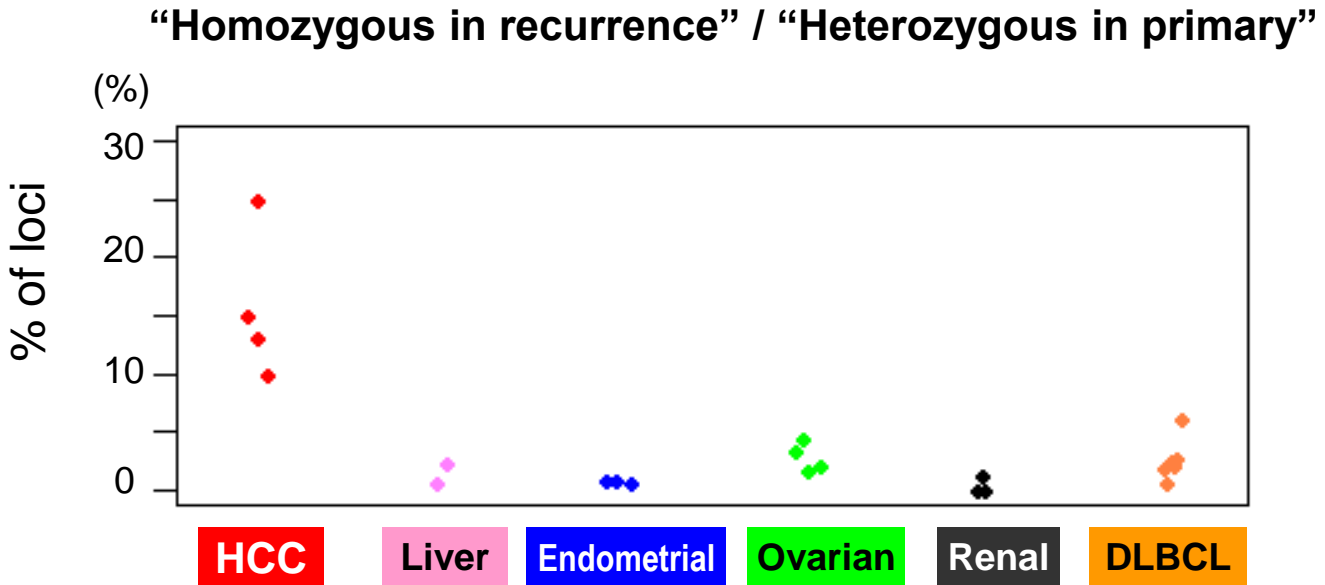

# Supplementary Figure 8

A

Cancer tissues

190 samples

16003 probes

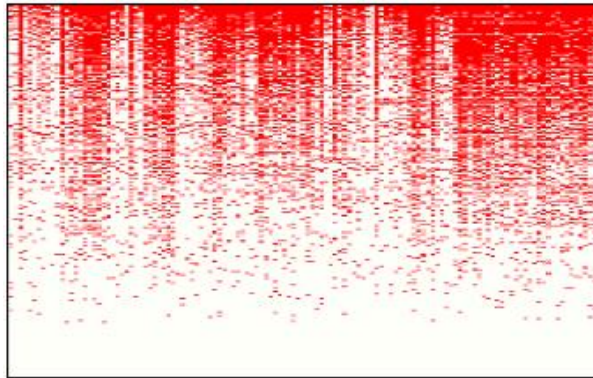

B

Normal tissues

158 samples

22216 probes

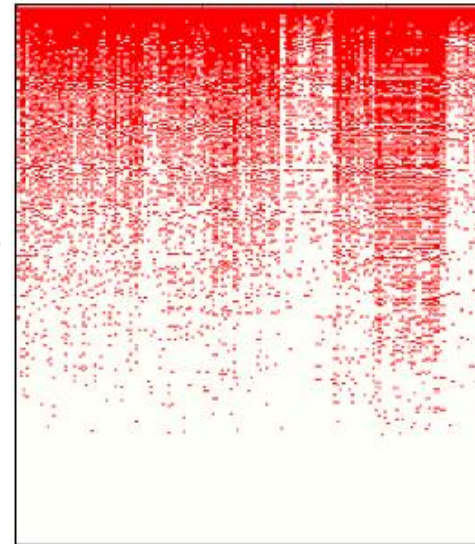

■ Gene probes with “Present” call

# Supplementary Figure 9A,B

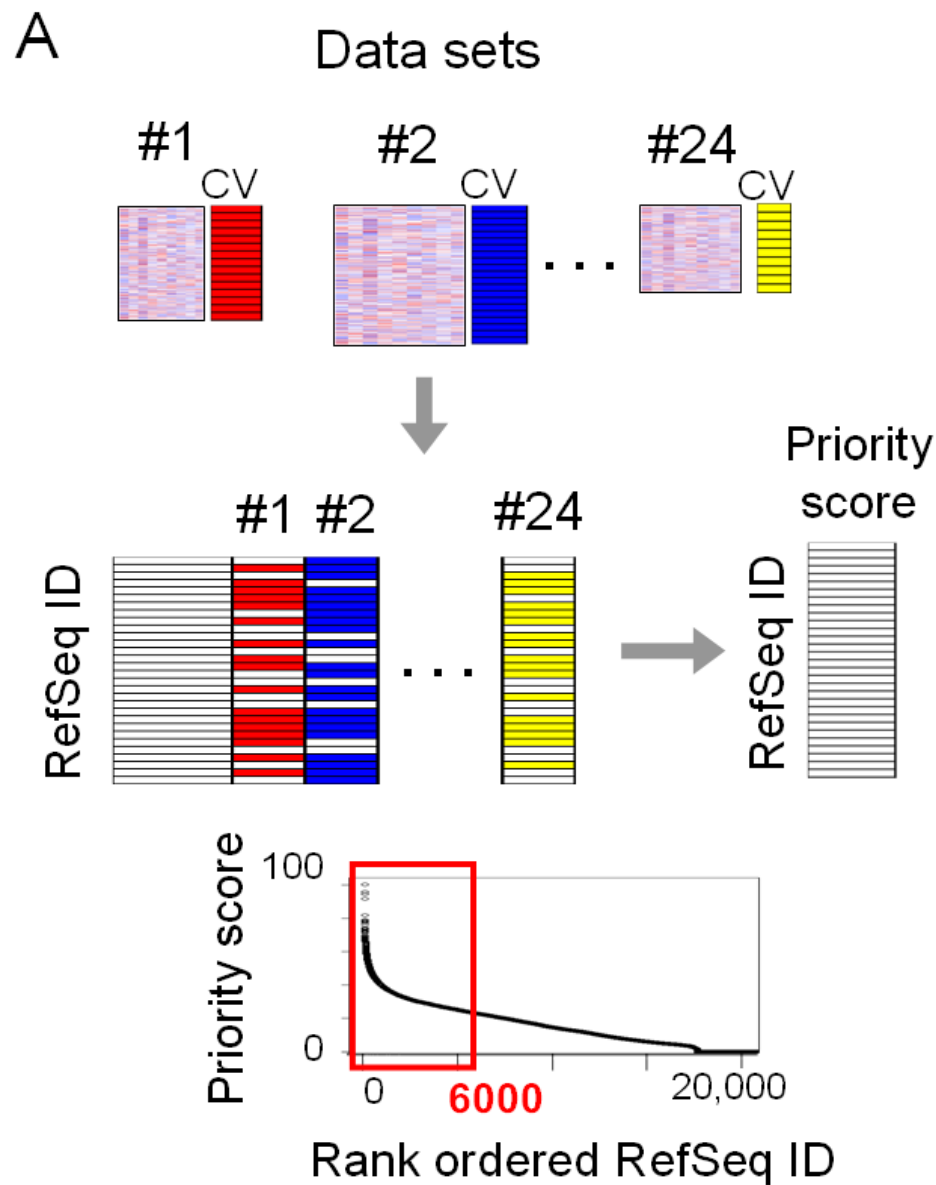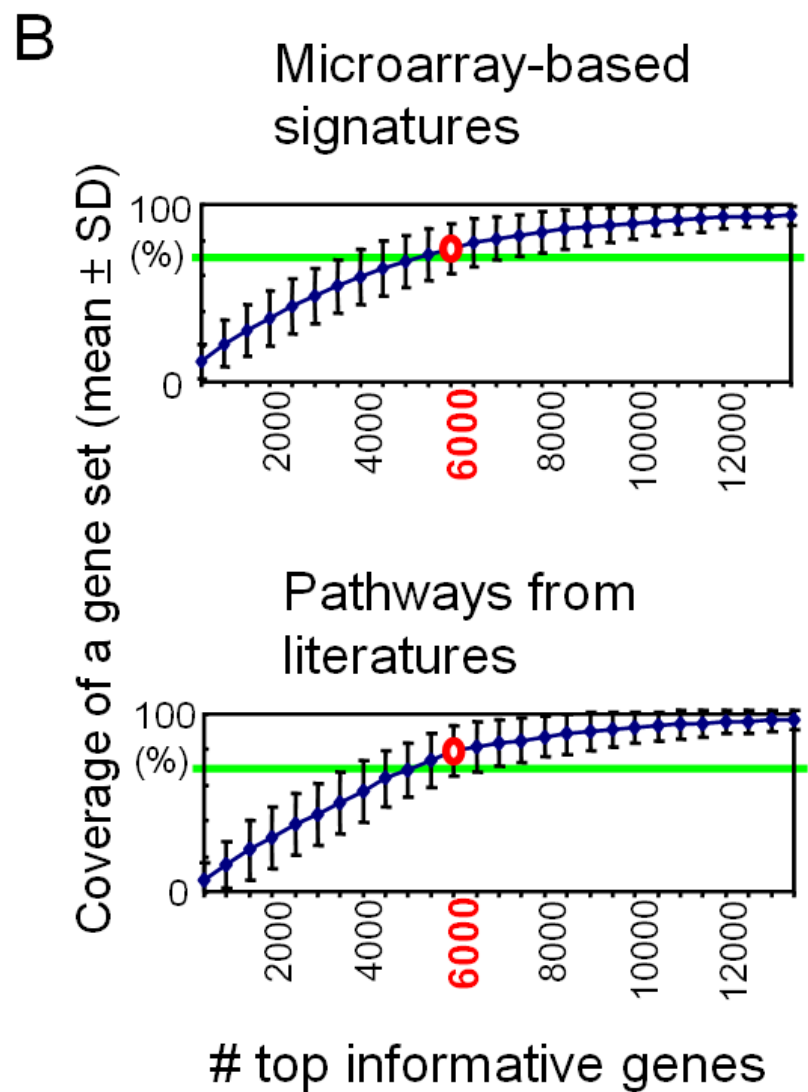

# Supplementary Figure 9C

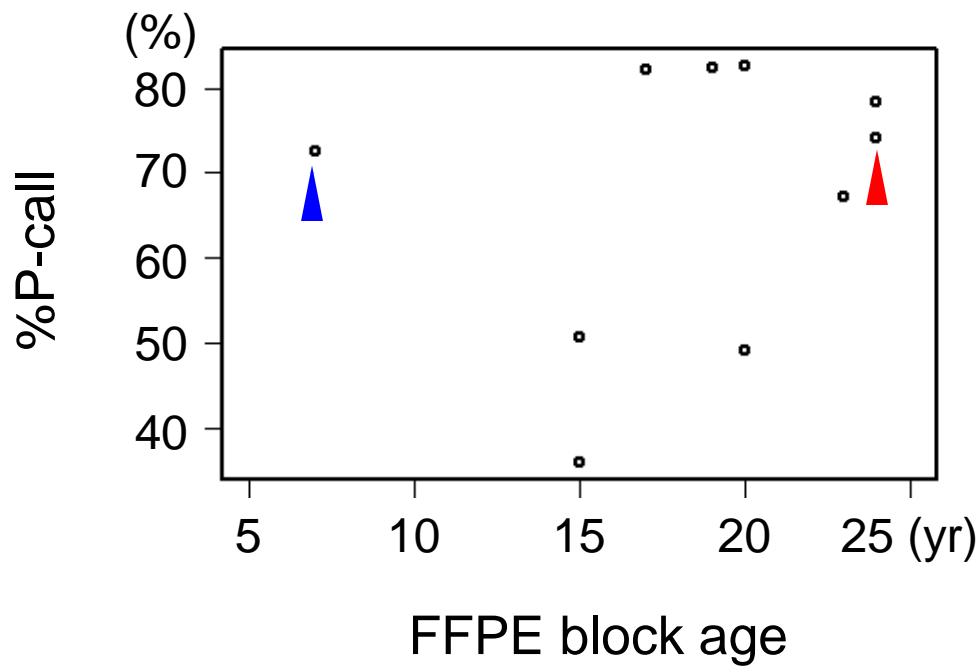

# Supplementary Figure 10

A Tumor profiles

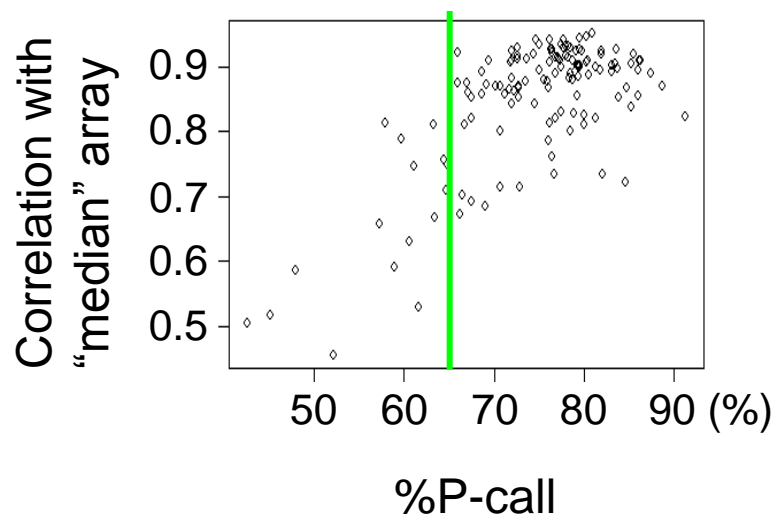

B Adjacent liver profiles

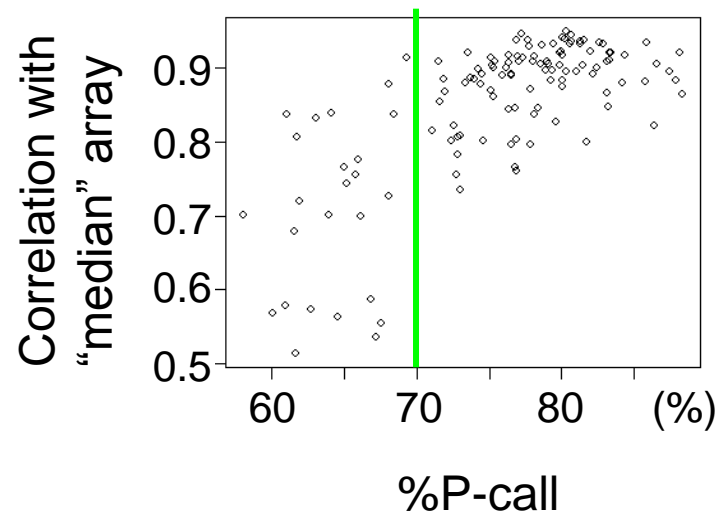

# Supplementary Figure 11

(log2 fold change)

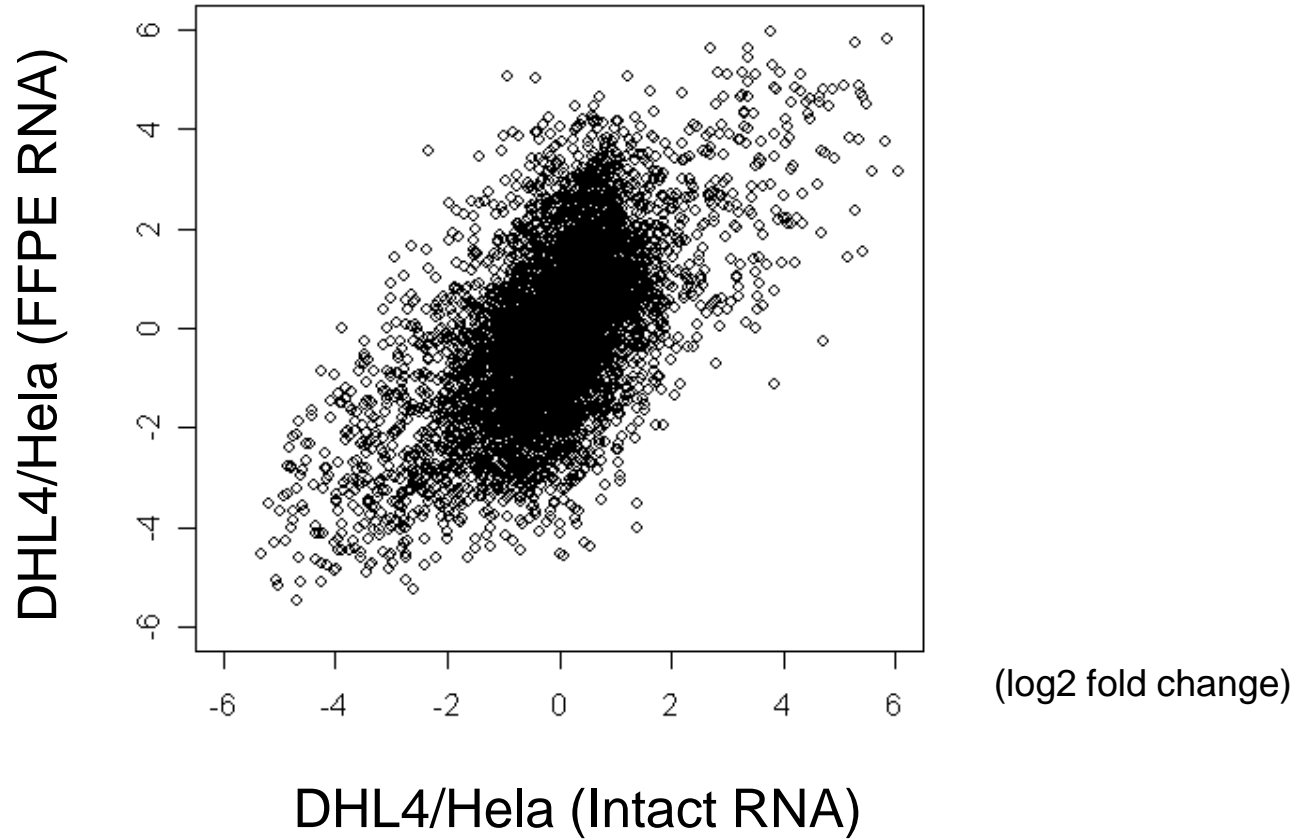

# Supplementary Figure 12

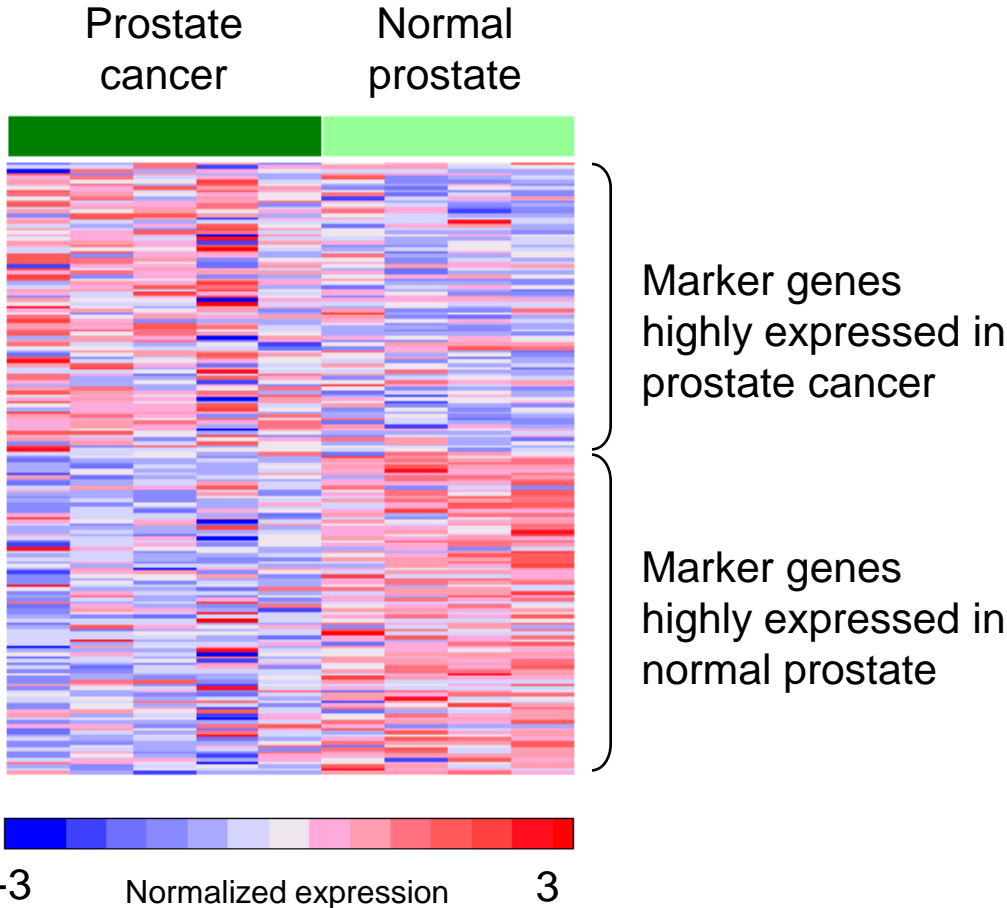

# Supplementary Figure 13

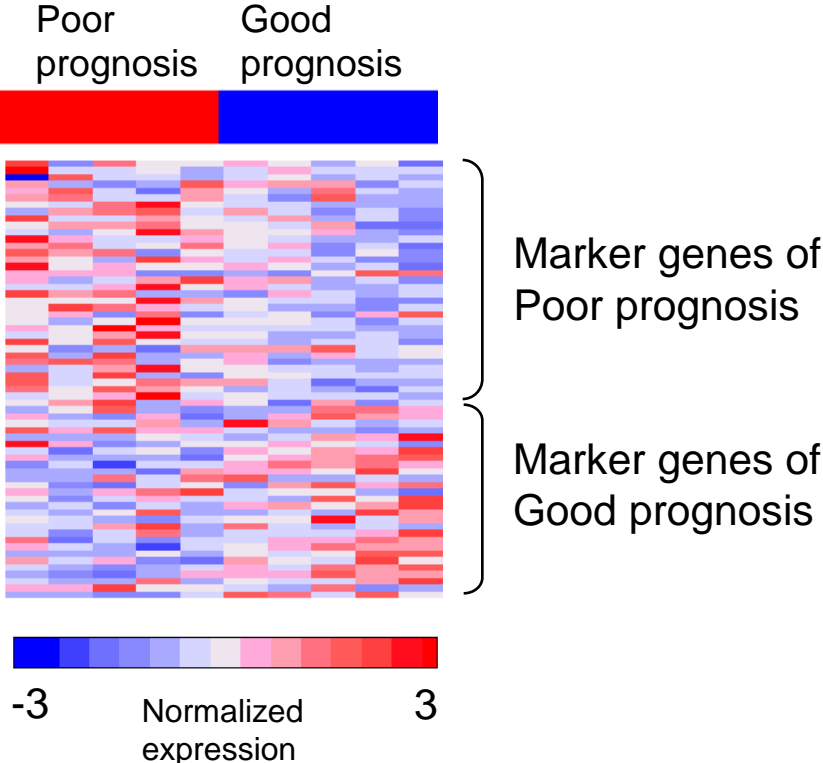

# Supplementary Figure 14

A

US

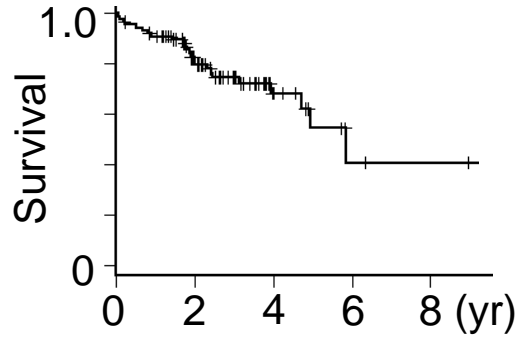

Spain

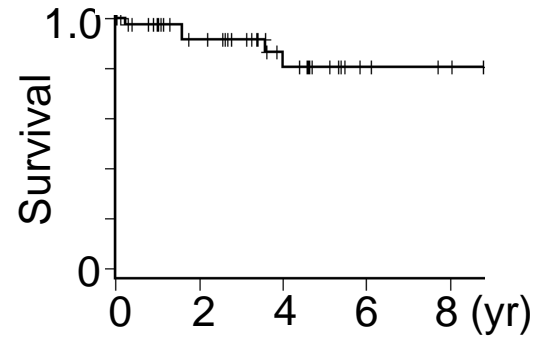

Italy

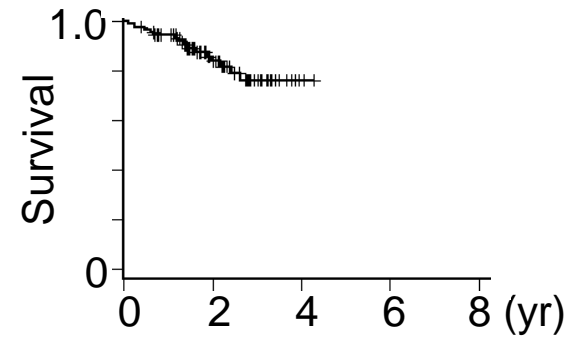

B

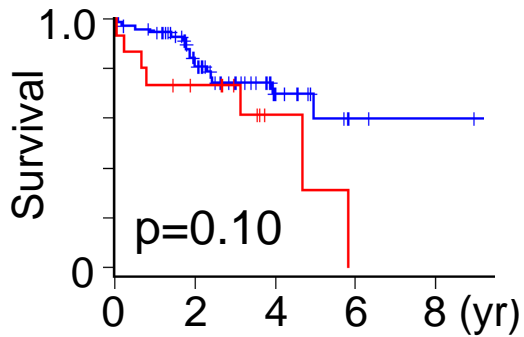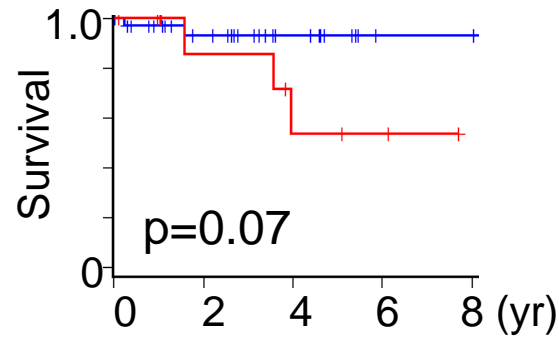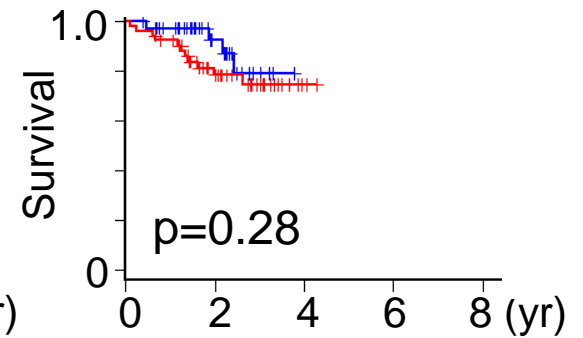

Supplement: nejm_hoshida_1995sa1.pdf [file nejm_hoshida_1995sa1.pdf]
